# Supplementary material
Source: PubMed Central journal article supplement (PMC2597167)
Supplement: NIHMS67899-supplement-03.pdf [file NIHMS67899-supplement-03.pdf]

| IPI Number  | Description                                                                                                                                                                                                                                                                                                                                                                                                                     | Total Spectral Counts | Percent Parent Remaining | Persistent Fragment Class | Explicit Site? | Peptograph                                                                            |
|-------------|---------------------------------------------------------------------------------------------------------------------------------------------------------------------------------------------------------------------------------------------------------------------------------------------------------------------------------------------------------------------------------------------------------------------------------|-----------------------|--------------------------|---------------------------|----------------|---------------------------------------------------------------------------------------|
| IPI0007935  | <p>IPI0007935 - PDLIM5 PDZ and LIM domain protein 5 ENSG00000163110</p> <p>Query seq. 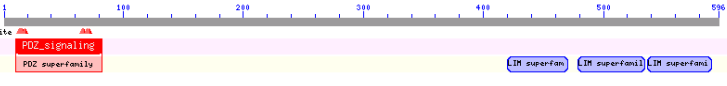</p> <p>Specific hits: PDZ signaling</p> <p>Superfamilies: PDZ superfamily, LIM superfamily, LIM superfamily</p>                                                                                                                                         | 19                    | 0%                       | Both                      |                |    |
| IPI00289862 | <p>IPI00289862 - SCRIN1 Secernin-1 ENSG00000136193</p> <p>Query seq. </p> <p>Superfamilies: Peptidase_C69 superfamily</p>                                                                                                                                                                                                                      | 20                    | 0%                       | Both                      |                |    |
| IPI00219036 | <p>IPI00219036 - DICER1 dicer1 ENSG00000100697</p> <p>Query seq. </p> <p>Specific hits: DEXDC, HELICc, PDZ_dicer, RIBOC</p> <p>Superfamilies: RBC_ATPase, HELICc s, deRNA s, PDZ superf, RIBOC superfi</p>                                                                                                                                     | 22                    | 0%                       | Both                      |                |    |
| IPI00217357 | <p>IPI00217357 - CCAR1 Cell division cycle and apoptosis regulator protein 1 ENSG00000060339</p> <p>Query seq. </p> <p>Superfamilies: SMP</p>                                                                                                                                                                                                  | 17                    | 0%                       | Both                      |                |    |
| IPI00026262 | <p>IPI00026262 - RASA1 Isoform 1 of Ras GTPase-activating protein 1 ENSG00000145715</p> <p>Query seq. </p> <p>Specific hits: SH2, SH2, PH-13ha sup, C2, RasGAP_p120GAP, RasGAP superfamily</p> <p>Superfamilies: SH2 superfa, SH3 sup, SH2 superfam, PH-13ha sup, C2 superfamily, RasGAP superfamily, RasGAP</p> <p>Multi-domains: RasGAP</p> | 25                    | 0%                       | Both                      |                |   |
| IPI00014456 | <p>IPI00014456 - STRN Isoform 1 of Striatin ENSG00000115808</p> <p>Query seq. </p> <p>Specific hits: WD40</p> <p>Superfamilies: Striatin superfamily, WD40 superfamily</p>                                                                                                                                                                   | 14                    | 0%                       | Both                      |                |  |
| IPI00008223 | <p>IPI00008223 - RAD23B UV excision repair protein RAD23 homolog B ENSG00000119318</p> <p>Query seq. </p> <p>Specific hits: RAD23_N</p> <p>Superfamilies: UBA superfamily, UBR superfam, UBR superfam</p>                                                                                                                                    | 26                    | 0%                       | Both                      |                |  |
| IPI00220726 | <p>IPI00220726 - CASP8 Isoform 9 of Caspase-8 precursor ENSG00000064012</p> <p>Query seq. </p> <p>Specific hits: DED, DED, CASc</p> <p>Superfamilies: DED superfamily, DED superfamily, CASc superfamily</p>                                                                                                                                 | 25                    | 11.7%                    | Both                      |                |  |
| IPI00011702 | <p>IPI00011702 - KIAA0406 Uncharacterized protein KIAA0406 ENSG00000101407</p> <p>Query seq. <br/> ... No conserved domains have been identified for this query sequence ...</p>                                                                                                                                                                                                                                                | 24                    | 13.3%                    | Both                      |                |  |

|                    |                                                                                                                                                                                                                                                               |           |              |               |                |                                                                                       |
|--------------------|---------------------------------------------------------------------------------------------------------------------------------------------------------------------------------------------------------------------------------------------------------------|-----------|--------------|---------------|----------------|---------------------------------------------------------------------------------------|
| <p>IPI00238209</p> | <p>IPI00238209 - NUDCD3 NudC domain-containing protein 3 ENSG00000015676</p> <p>Query seq. 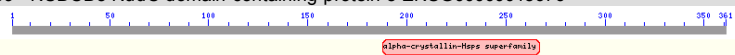</p> <p>Specific hits<br/>Superfamilies</p>                                       | <p>26</p> | <p>20%</p>   | <p>Both</p>   | <p>IEID119</p> |     |
| <p>IPI00182116</p> | <p>IPI00182116 - ARHGAP15 Rho GTPase-activating protein 15 ENSG00000075884</p> <p>Query seq. </p> <p>Specific hits<br/>Superfamilies</p>                                     | <p>25</p> | <p>71.4%</p> | <p>Both</p>   |                |    |
| <p>IPI00221172</p> | <p>IPI00221172 - C14orf130 Uncharacterized protein C14orf130 ENSG00000012963</p> <p>Query seq. </p> <p>Specific hits<br/>Superfamilies</p>                                   | <p>24</p> | <p>100%</p>  | <p>Both</p>   |                |    |
| <p>IPI00032831</p> | <p>IPI00032831 - SNAP29 Synaptosomal-associated protein 29 ENSG00000099940</p> <p>Query seq. </p> <p>Specific hits<br/>Superfamilies</p>                                     | <p>18</p> | <p>0%</p>    | <p>C-term</p> |                |    |
| <p>IPI00061780</p> | <p>IPI00061780 - ITCH Isoform 1 of E3 ubiquitin-protein ligase Itchy homolog ENSG00000078747</p> <p>Query seq. </p> <p>Specific hits<br/>Superfamilies<br/>Multi-domains</p> | <p>17</p> | <p>0%</p>    | <p>C-term</p> |                |    |
| <p>IPI00009913</p> | <p>IPI00009913 - TTRAP TRAF and TNF receptor-associated protein ENSG00000111802</p> <p>Query seq. </p> <p>Specific hits<br/>Superfamilies</p>                              | <p>19</p> | <p>0%</p>    | <p>C-term</p> |                |   |
| <p>IPI00844470</p> | <p>IPI00844470 - C13orf8 Zinc finger, C2H2-type domain containing protein ENSG00000198824</p> <p>Query seq. <br/>... No conserved domains have been identified for this query sequence ...</p> <p>Specific hits<br/>Superfamilies</p>                         | <p>18</p> | <p>0%</p>    | <p>C-term</p> |                |  |
| <p>IPI00032342</p> | <p>IPI00032342 - TRIP12 TRIP12 protein ENSG00000153827</p> <p>Query seq. </p> <p>Specific hits<br/>Superfamilies<br/>Multi-domains</p>                                     | <p>19</p> | <p>0%</p>    | <p>C-term</p> |                |  |
| <p>IPI00028065</p> | <p>IPI00028065 - NCK1 Cytoplasmic protein NCK1 ENSG00000158092</p> <p>Query seq. </p> <p>Specific hits<br/>Superfamilies</p>                                               | <p>24</p> | <p>0%</p>    | <p>C-term</p> | <p>SVPD88</p>  |  |
| <p>IPI00746337</p> | <p>IPI00746337 - PMS2 PMS1 protein homolog 2 ENSG00000122512</p> <p>Query seq. </p> <p>Specific hits<br/>Superfamilies</p>                                                 | <p>18</p> | <p>0%</p>    | <p>C-term</p> |                |  |

|             |                                                                                                                                                                                                                                                                                     |    |    |        |         |                                                                                       |
|-------------|-------------------------------------------------------------------------------------------------------------------------------------------------------------------------------------------------------------------------------------------------------------------------------------|----|----|--------|---------|---------------------------------------------------------------------------------------|
| IPI0000856  | <p>IPI0000856 - PLEKHC1 Isoform 1 of Pleckstrin homology domain-containing family C member 1 ENSG00000073712</p> <p>Query seq. 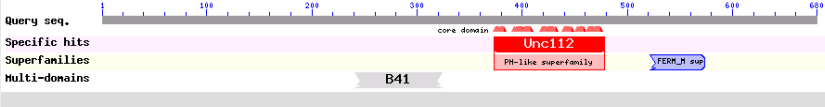</p> <p>Specific hits</p> <p>Superfamilies</p> <p>Multi-domains</p> | 18 | 0% | C-term | DEVD347 |     |
| IPI00739940 | <p>IPI00739940 - FRYL Isoform 1 of Protein furry homolog-like ENSG00000170495</p> <p>Query seq. </p> <p>... No conserved domains have been identified for this query sequence ...</p>              | 11 | 0% | C-term |         |    |
| IPI00241409 | <p>IPI00241409 - FAM21B hypothetical protein LOC55747 ENSG00000152726</p> <p>Query seq. </p> <p>... No conserved domains have been identified for this query sequence ...</p>                      | 14 | 0% | C-term |         |    |
| IPI00020258 | <p>IPI00020258 - MAP4K1 Mitogen-activated protein kinase kinase kinase kinase 1 ENSG00000104814</p> <p>Query seq. </p> <p>Specific hits</p> <p>Superfamilies</p> <p>Multi-domains</p>              | 15 | 0% | C-term |         |    |
| IPI00328571 | <p>IPI00328571 - FAM39B Family with sequence similarity 39, member B ENSG00000155352</p> <p>Query seq. </p> <p>... No conserved domains have been identified for this query sequence ...</p>       | 13 | 0% | C-term |         |   |
| IPI00830067 | <p>IPI00830067 - ARHGAP30 Isoform 1 of Rho GTPase-activating protein 30 ENSG00000186517</p> <p>Query seq. </p> <p>Specific hits</p> <p>Superfamilies</p> <p>Multi-domains</p>                    | 9  | 0% | C-term | AQED776 |  |
| IPI00643027 | <p>IPI00643027 - LARP1 Isoform 2 of La-related protein 1 ENSG00000155506</p> <p>Query seq. </p> <p>Superfamilies</p> <p>Multi-domains</p>                                                        | 22 | 0% | C-term |         |  |
| IPI00737617 | <p>IPI00737617 - - - Uncharacterized protein ENSP00000370261 ENSG00000205606</p> <p>Query seq. </p> <p>Superfamilies</p>                                                                         | 12 | 0% | C-term |         |  |
| IPI00306043 | <p>IPI00306043 - YTHDF2 Isoform 1 of YTH domain family protein 2 ENSG00000198492</p> <p>Query seq. </p> <p>Superfamilies</p>                                                                     | 26 | 0% | C-term |         |  |
| IPI00179016 | <p>IPI00179016 - SETD1A Uncharacterized protein SETD1A ENSG00000099381</p> <p>Query seq. </p> <p>Superfamilies</p>                                                                               | 8  | 0% | C-term |         |  |

|             |                                                                                                                                                                                                                                                                      |    |       |        |         |
|-------------|----------------------------------------------------------------------------------------------------------------------------------------------------------------------------------------------------------------------------------------------------------------------|----|-------|--------|---------|
| IPI00783908 | <p>IPI00783908 - DIS3L2 DIS3 mitotic control homolog (<i>S. cerevisiae</i>)-like 2 ENSG00000144535</p> <p>Query seq. </p> <p>Superfamilies: RNB superfamily</p>                                                                                                      | 9  | 0%    | C-term |         |
| IPI00167764 | <p>IPI00167764 - TMEM102 Transmembrane protein 102 ENSG00000181284</p> <p>Query seq. </p> <p>... No conserved domains have been identified for this query sequence ...</p>                                                                                           | 8  | 0%    | C-term |         |
| IPI00759749 | <p>IPI00759749 - PARG Isoform 1 of Poly(ADP-ribose) glycohydrolase ENSG00000204155</p> <p>Query seq. </p> <p>Superfamilies: PARG_cat superfamily</p>                                                                                                                 | 25 | 17.6% | C-term |         |
| IPI00657692 | <p>IPI00657692 - COL4A3BP Goodpasture antigen-binding protein ENSG00000113163</p> <p>Query seq. </p> <p>Specific hits: PH_LGPBP, START</p> <p>Superfamilies: PH-like superfamily, START superfamily</p> <p>Multi-domains: PH-like superfamily, START superfamily</p> | 25 | 18.1% | C-term |         |
| IPI00291946 | <p>IPI00291946 - USP10 Ubiquitin carboxyl-terminal hydrolase 10 ENSG00000103194</p> <p>Query seq. </p> <p>Specific hits: Peptidase_C19</p> <p>Superfamilies: Peptidase_C19 superfamily, UBP5</p> <p>Multi-domains: Peptidase_C19 superfamily, UBP5</p>               | 29 | 22.2% | C-term |         |
| IPI00183508 | <p>IPI00183508 - TWF1 twinfilin 1 ENSG00000151239</p> <p>Query seq. </p> <p>Specific hits: ADF, ADF</p> <p>Superfamilies: ADF superfamily, ADF superfamily</p> <p>Multi-domains: ADF superfamily, ADF superfamily</p>                                                | 24 | 27.2% | C-term |         |
| IPI00001062 | <p>IPI00001062 - MYD88 Myeloid differentiation primary response protein MyD88 ENSG00000172936</p> <p>Query seq. </p> <p>Superfamilies: Death superfamily, TIR superfamily</p>                                                                                        | 26 | 28.5% | C-term |         |
| IPI00163172 | <p>IPI00163172 - SKP2 Isoform 3 of S-phase kinase-associated protein 2 ENSG00000145604</p> <p>Query seq. </p> <p>Superfamilies: E-box superfamily</p>                                                                                                                | 16 | 40%   | C-term |         |
| IPI00032955 | <p>IPI00032955 - ZNF313 Zinc finger protein 313 ENSG00000124226</p> <p>Query seq. </p> <p>Specific hits: RING, D19</p> <p>Superfamilies: RING superfamily, D19 superfamily</p>                                                                                       | 25 | 61.5% | C-term | TFVD208 |
| IPI00395568 | <p>IPI00395568 - PHF6 Isoform 1 of PHD finger protein 6 ENSG00000156531</p> <p>Query seq. </p> <p>... No conserved domains have been identified for this query sequence ...</p>                                                                                      | 20 | 66.6% | C-term |         |

|             |                                                                                                                                                                                                                                                                                         |    |      |          |         |  |
|-------------|-----------------------------------------------------------------------------------------------------------------------------------------------------------------------------------------------------------------------------------------------------------------------------------------|----|------|----------|---------|--|
| IPI00008531 | <p>IPI00008531 - RCOR1 REST corepressor 1 ENSG00000089902</p> <p>Query seq. </p> <p>Superfamilies <b>ELM2 superfamily</b> <b>SMT superfam</b></p>                                                                                                                                       | 27 | 75%  | C-term   |         |  |
| IPI00031614 | <p>IPI00031614 - GINS4 GINS complex subunit 4 ENSG00000147536</p> <p>Query seq. </p> <p>Superfamilies <b>Sid5 superfamily</b></p>                                                                                                                                                       | 12 | 75%  | C-term   | EEVD6   |  |
| IPI00555734 | <p>IPI00555734 - ASRGL1 asparaginase-like 1 protein ENSG00000162174</p> <p>Query seq. </p> <p>Specific hits <b>ASRGL1 like</b></p> <p>Superfamilies <b>Ntn_Asparaginase_2_like superfamily</b></p>                                                                                      | 22 | 80%  | C-term   |         |  |
| IPI00001999 | <p>IPI00001999 - OIP5 Opa-interacting protein 5 ENSG00000104147</p> <p>Query seq. </p> <p>... No conserved domains have been identified for this query sequence ...</p>                                                                                                                 | 18 | 100% | C-term   |         |  |
| IPI00002408 | <p>IPI00002408 - RPAP3 Isoform 1 of RNA polymerase II-associated protein 3 ENSG00000005175</p> <p>Query seq. </p> <p>Specific hits <b>TPR</b> <b>TPR</b></p> <p>Superfamilies <b>TPR superfamily</b> <b>TPR superfamily</b></p>                                                         | 17 | 0%   | Multiple |         |  |
| IPI00294211 | <p>IPI00294211 - DHX38 Pre-mRNA-splicing factor ATP-dependent RNA helicase PRP16 ENSG00000140829</p> <p>Query seq. </p> <p>Specific hits <b>DEXHc</b> <b>HELICc</b></p> <p>Superfamilies <b>HBC_RTPase superf</b> <b>HELICc superfamily</b> <b>HR2 superfam</b> <b>DUF1615 supe</b></p> | 12 | 0%   | Multiple |         |  |
| IPI00552897 | <p>IPI00552897 - MDC1 Isoform 1 of Mediator of DNA damage checkpoint protein 1 ENSG00000137337</p> <p>Query seq. </p> <p>Specific hits <b>FHA</b></p> <p>Superfamilies <b>FHA sup</b></p> <p>Multi-domains <b>Herpes BLLF1</b></p>                                                      | 22 | 0%   | Multiple |         |  |
| IPI00005648 | <p>IPI00005648 - SAFB2 Scaffold attachment factor B2 ENSG00000130254</p> <p>Query seq. </p> <p>Superfamilies <b>SRF</b> <b>RRM1 super</b></p>                                                                                                                                           | 9  | 0%   | Multiple | DLFD261 |  |
| IPI00396131 | <p>IPI00396131 - YTHDF3 YTH domain family protein 3 ENSG00000185728</p> <p>Query seq. </p> <p>Superfamilies <b>YTH superfamily</b></p>                                                                                                                                                  | 15 | 0%   | Multiple | AITD168 |  |
| IPI00797279 | <p>IPI00797279 - UHRF1 ubiquitin-like, containing PHD and RING finger domains, 1 isoform 2 ENSG00000034063</p> <p>Query seq. </p> <p>Specific hits <b>NIRF_N</b></p> <p>Superfamilies <b>UBR superfamily</b> <b>PHD supe</b> <b>YDC_SRA superfamily</b> <b>RING</b> <b>RING suv</b></p> | 27 | 0%   | N-term   |         |  |

|             |                                                                                                                                                                                                                                                                                                                                                                           |    |    |        |         |                                                                                       |
|-------------|---------------------------------------------------------------------------------------------------------------------------------------------------------------------------------------------------------------------------------------------------------------------------------------------------------------------------------------------------------------------------|----|----|--------|---------|---------------------------------------------------------------------------------------|
| IPI00747740 | <p>IPI00747740 - WDR44 102 kDa protein ENSG00000131725</p> <p>Query seq. 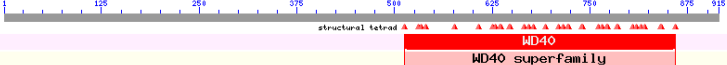</p> <p>Specific hits <b>WD40</b></p> <p>Superfamilies <b>WD40 superfamily</b></p>                                                                                                                              | 25 | 0% | N-term |         |     |
| IPI00152089 | <p>IPI00152089 - CXorf38 Isoform 1 of Uncharacterized protein CXorf38 ENSG00000185753</p> <p>Query seq. </p> <p>... No conserved domains have been identified for this query sequence ...</p>                                                                                            | 21 | 0% | N-term |         |    |
| IPI00022471 | <p>IPI00022471 - HMHA1 minor histocompatibility antigen HA-1 ENSG00000180448</p> <p>Query seq. </p> <p>Superfamilies <b>FCN superfamily</b> <b>RhoGAP superfamily</b></p>                                                                                                                | 29 | 0% | N-term |         |    |
| IPI00794221 | <p>IPI00794221 - DBN1 76 kDa protein ENSG00000113758</p> <p>Query seq. </p> <p>Specific hits <b>ADF</b></p> <p>Superfamilies <b>ADF superfamily</b></p>                                                                                                                                  | 28 | 0% | N-term |         |    |
| IPI00333770 | <p>IPI00333770 - DOCK10 dedicator of cytokinesis 10 ENSG00000135905</p> <p>Query seq. </p> <p>Specific hits <b>PH</b></p> <p>Superfamilies <b>PH-II</b> <b>ded_cyto sup</b></p>                                                                                                          | 22 | 0% | N-term |         |    |
| IPI00023191 | <p>IPI00023191 - TOM1 Target of myb1 ENSG00000100284</p> <p>Query seq. </p> <p>Specific hits <b>VHS_Tom1</b></p> <p>Superfamilies <b>VHS_ENTH_ANTH superfamily</b> <b>GAT superfamily</b></p>                                                                                          | 15 | 0% | N-term | VGTD184 |   |
| IPI00397383 | <p>IPI00397383 - KIF1B Isoform 4 of Kinesin-like protein KIF1B ENSG00000054523</p> <p>Query seq. </p> <p>Specific hits <b>K1Sc_KIF1A_KIF1B</b> <b>FHA</b></p> <p>Superfamilies <b>Kinesin</b> <b>PH-like</b></p> <p>Multi-domains <b>Kinesin</b></p>                                   | 18 | 0% | N-term |         |  |
| IPI00386747 | <p>IPI00386747 - CDAN1 Isoform 2 of Codanin-1 ENSG00000140326</p> <p>Query seq. </p> <p>... No conserved domains have been identified for this query sequence ...</p>                                                                                                                  | 14 | 0% | N-term |         |  |
| IPI00479720 | <p>IPI00479720 - ARHGAP25 Rho GTPase activating protein 25 isoform a ENSG00000163219</p> <p>Query seq. </p> <p>Specific hits <b>PH</b> <b>RhoGAP_ARHGAP22_24_25</b></p> <p>Superfamilies <b>PH-like superfamily</b> <b>RhoGAP superfamily</b></p> <p>Multi-domains <b>PRK03918</b></p> | 15 | 0% | N-term |         |  |
| IPI00290514 | <p>IPI00290514 - INTS9 Integrator complex subunit 9 ENSG00000104299</p> <p>Query seq. </p> <p>Multi-domains <b>YSH1</b></p>                                                                                                                                                            | 18 | 0% | N-term |         |  |

|             |                                                                                                                                                                                                                                                                                                                               |    |    |        |                                                                                       |
|-------------|-------------------------------------------------------------------------------------------------------------------------------------------------------------------------------------------------------------------------------------------------------------------------------------------------------------------------------|----|----|--------|---------------------------------------------------------------------------------------|
| IPI00163851 | <p>IPI00163851 - EIF2AK4 Isoform 1 of Eukaryotic translation initiation factor 2-alpha kinase 4 ENSG00000128829</p> <p>Query seq. </p> <p>Specific hits: S_TKc</p> <p>Superfamilies: S_TKc superfamily</p> <p>Multi-domains: S_TKc, His5</p> | 14 | 0% | N-term |    |
| IPI00478608 | <p>IPI00478608 - PSCD1 Isoform 1 of Cytohesin-1 ENSG00000108669</p> <p>Query seq. </p> <p>Specific hits: Sec7, PH_cytohesin</p> <p>Superfamilies: Sec7 superfamily, PH-like superfamily</p>                                                  | 14 | 0% | N-term |    |
| IPI00005495 | <p>IPI00005495 - ATXN3 Isoform 1 of Ataxin-3 ENSG00000066427</p> <p>Query seq. </p> <p>Superfamilies: Josephin superfamily</p> <p>Multi-domains: Malt</p>                                                                                    | 15 | 0% | N-term |    |
| IPI00414442 | <p>IPI00414442 - CDK5RAP3 Isoform 1 of CDK5 regulatory subunit-associated protein 3 ENSG00000108465</p> <p>Query seq. </p> <p>Superfamilies: DUF773 superfamily</p>                                                                          | 20 | 0% | N-term |    |
| IPI00013773 | <p>IPI00013773 - RIPK1 Receptor-interacting serine/threonine-protein kinase 1 ENSG00000137275</p> <p>Query seq. </p> <p>Specific hits: S_TKc</p> <p>Superfamilies: S_TKc superfamily</p> <p>Multi-domains: TyrKc</p>                         | 11 | 0% | N-term |   |
| IPI00641384 | <p>IPI00641384 - SEC16A SEC16 homolog A ENSG00000148396</p> <p>Query seq. </p> <p>... No conserved domains have been identified for this query sequence ...</p>                                                                            | 11 | 0% | N-term |  |
| IPI00411984 | <p>IPI00411984 - STK3 Serine/threonine-protein kinase 3 ENSG00000104375</p> <p>Query seq. </p> <p>Specific hits: S_TKc</p> <p>Superfamilies: S_TKc superfamily</p> <p>Multi-domains: S_TKc</p>                                             | 24 | 0% | N-term |  |
| IPI00642374 | <p>IPI00642374 - UCHL5 Ubiquitin carboxyl-terminal hydrolase L5 ENSG00000116750</p> <p>Query seq. </p> <p>Superfamilies: Peptidase_C12 superfamily</p>                                                                                     | 14 | 0% | N-term |  |
| IPI00472164 | <p>IPI00472164 - WASF2 Wiskott-Aldrich syndrome protein family member 2 ENSG00000158195</p> <p>Query seq. </p> <p>... No conserved domains have been identified for this query sequence ...</p>                                            | 13 | 0% | N-term |  |
| IPI00641990 | <p>IPI00641990 - LAS1L Isoform 1 of LAS1-like protein ENSG00000001497</p> <p>Query seq. </p> <p>Superfamilies: Las1 superfamily</p>                                                                                                        | 10 | 0% | N-term |  |

|             |                                                                                                                                                                                                                                                                                                  |    |    |        |         |                                                                                       |
|-------------|--------------------------------------------------------------------------------------------------------------------------------------------------------------------------------------------------------------------------------------------------------------------------------------------------|----|----|--------|---------|---------------------------------------------------------------------------------------|
| IPI00010882 | <p>IPI00010882 - DFFA Isoform DFF45 of DNA fragmentation factor subunit alpha (Fragment)<br/>ENSG00000160049</p> <p>Query seq. </p> <p>Superfamilies CIDE-N superfamily, DFF-C superfamily</p>                  | 11 | 0% | N-term |         |     |
| IPI00797603 | <p>IPI00797603 - PRPSAP1 Phosphoribosyl pyrophosphate synthetase-associated protein 1<br/>ENSG00000161542</p> <p>Query seq. </p> <p>Superfamilies Pribsyltran superfamily</p> <p>Multi-domains PrsA</p>         | 23 | 0% | N-term |         |    |
| IPI00016387 | <p>IPI00016387 - PCF11 PCF11, cleavage and polyadenylation factor subunit, homolog<br/>ENSG00000165494</p> <p>Query seq. </p> <p>Specific hits CID</p> <p>Superfamilies WH5_ENTH_R</p>                          | 18 | 0% | N-term |         |    |
| IPI00004472 | <p>IPI00004472 - WNK1 Isoform 1 of Serine/threonine-protein kinase WNK1<br/>ENSG00000060237</p> <p>Query seq. </p> <p>Specific hits S_TKc</p> <p>Superfamilies S_TKc superfamily</p> <p>Multi-domains S_TKc</p> | 17 | 0% | N-term |         |    |
| IPI00019226 | <p>IPI00019226 - BRD8 Isoform 1 of Bromodomain-containing protein 8<br/>ENSG00000112983</p> <p>Query seq. </p> <p>Superfamilies Bromodomain</p> <p>Multi-domains Bromodomain, COG5076</p>                       | 9  | 0% | N-term |         |   |
| IPI00005015 | <p>IPI00005015 - CNOT3 Isoform 1 of CCR4-NOT transcription complex subunit 3<br/>ENSG00000088038</p> <p>Query seq. </p> <p>Superfamilies Not3</p> <p>Multi-domains Not3</p>                                   | 9  | 0% | N-term |         |  |
| IPI00328828 | <p>IPI00328828 - ARID4B Isoform 1 of AT-rich interactive domain-containing protein 4B<br/>ENSG00000054267</p> <p>Query seq. </p> <p>Superfamilies Tudor, BB1MT super, ARID super</p>                          | 13 | 0% | N-term |         |  |
| IPI00847489 | <p>IPI00847489 - TFG TRK-fused<br/>ENSG00000114354</p> <p>Query seq. </p> <p>Superfamilies PBI superfamily</p>                                                                                                | 11 | 0% | N-term | DTVD142 |  |
| IPI00374657 | <p>IPI00374657 - VAPA vesicle-associated membrane protein-associated protein A isoform 1<br/>ENSG00000101558</p> <p>Query seq. </p> <p>Superfamilies Motile_Sperm superfamily</p>                             | 14 | 0% | N-term |         |  |
| IPI00607616 | <p>IPI00607616 - HRB Isoform 1 of Nucleoporin-like protein RIP<br/>ENSG00000173744</p> <p>Query seq. </p> <p>Superfamilies hrfgap superfamily</p>                                                             | 14 | 0% | N-term |         |  |



|             |                                                                                                                                                                                                                                                                                                                                                                                                                                                                                                                                   |    |       |        |                                                                                       |
|-------------|-----------------------------------------------------------------------------------------------------------------------------------------------------------------------------------------------------------------------------------------------------------------------------------------------------------------------------------------------------------------------------------------------------------------------------------------------------------------------------------------------------------------------------------|----|-------|--------|---------------------------------------------------------------------------------------|
| IPI00289344 | <p>IPI00289344 - NCOR1 Isoform 1 of Nuclear receptor corepressor 1 ENSG00000141027</p> <p>Query seq. </p> <p>Specific hits </p> <p>Superfamilies </p>                                                                                                                          | 9  | 0%    | N-term |     |
| IPI00293009 | <p>IPI00293009 - RABEP1 Isoform 1 of Rab GTPase-binding effector protein 1 ENSG00000029725</p> <p>Query seq. </p> <p>Specific hits </p> <p>Multi-domains </p>                                                                                                                  | 27 | 13.6% | N-term |    |
| IPI00742124 | <p>IPI00742124 - UBXD7 Isoform 1 of UBX domain-containing protein 7 ENSG00000163960</p> <p>Query seq. </p> <p>Specific hits </p> <p>Superfamilies </p>                                                                                                                         | 27 | 15%   | N-term |    |
| IPI00014220 | <p>IPI00014220 - KIAA0841 Isoform 1 of Uncharacterized protein KIAA0841 ENSG00000089336</p> <p>Query seq. </p> <p>... No conserved domains have been identified for this query sequence ...</p>                                                                                                                                                                                                                                                  | 17 | 16.6% | N-term |    |
| IPI00479385 | <p>IPI00479385 - ASMTL Uncharacterized protein ASMTL ENSG00000169093</p> <p>Query seq. </p> <p>Specific hits </p> <p>Superfamilies </p>                                                                                                                                       | 21 | 18.7% | N-term |   |
| IPI00480157 | <p>IPI00480157 - NUP153 Uncharacterized protein NUP153 ENSG00000124789</p> <p>Query seq. </p> <p>Superfamilies </p>                                                                                                                                                                                                                                         | 16 | 22.2% | N-term |  |
| IPI00025174 | <p>IPI00025174 - SDCCAG10 serologically defined colon cancer antigen 10 ENSG00000153015</p> <p>Query seq. </p> <p>Specific hits </p> <p>Superfamilies </p>                                                                                                               | 26 | 23.0% | N-term |  |
| IPI00792312 | <p>IPI00792312 - INTS3 Isoform 1 of Integrator complex subunit 3 ENSG00000143624</p> <p>Query seq. </p> <p>... No conserved domains have been identified for this query sequence ...</p>                                                                                                                                                                                                                                                       | 29 | 30.7% | N-term |  |
| IPI00745345 | <p>IPI00745345 - PPP4R2 Protein phosphatase 4 regulatory subunit 2 ENSG00000163605</p> <p>Query seq. </p> <p>Superfamilies </p>                                                                                                                                                                                                                             | 25 | 53.8% | N-term |  |
| IPI00744637 | <p>IPI00744637 - RUFY1 Isoform 1 of RUN and FYVE domain-containing protein 1 ENSG00000176783</p> <p>Query seq. </p> <p>Specific hits </p> <p>Superfamilies </p> <p>Multi-domains </p> | 23 | 60%   | N-term |  |

|             |                                                                                                                                                                                                                                                                                                                                       |    |       |         |                                                                                       |
|-------------|---------------------------------------------------------------------------------------------------------------------------------------------------------------------------------------------------------------------------------------------------------------------------------------------------------------------------------------|----|-------|---------|---------------------------------------------------------------------------------------|
| IPI00009688 | <p>IPI00009688 - PIP4K2A Phosphatidylinositol-5-phosphate 4-kinase type-2 alpha ENSG00000150867</p> <p>Query seq. </p> <p>Superfamilies <b>PIPKc superfamily</b> <b>PIPKc superfamily</b></p>                                                        | 18 | 62.5% | N-term  |     |
| IPI00016249 | <p>IPI00016249 - FXR1 Isoform 1 of Fragile X mental retardation syndrome-related protein 1 ENSG00000114416</p> <p>Query seq. </p> <p>Specific hits <b>KH-I</b></p> <p>Superfamilies <b>KH-I superfamily</b></p> <p>Multi-domains <b>PRK11824</b></p> | 10 | 66.6% | N-term  |    |
| IPI00019966 | <p>IPI00019966 - C5orf22 Uncharacterized protein C5orf22 ENSG00000082213</p> <p>Query seq. </p>                                                                                                                                                      | 23 | 72.7% | N-term  |    |
| IPI00553067 | <p>IPI00553067 - CCDC132 coiled-coil domain containing 132 isoform a ENSG00000004766</p> <p>Query seq. </p>                                                                                                                                          | 21 | 88.8% | N-term  |    |
| IPI00022462 | <p>IPI00022462 - TFRC Transferrin receptor protein 1 ENSG00000072274</p> <p>Query seq. </p> <p>Specific hits <b>PA_TFR</b></p> <p>Superfamilies <b>PA superfamily</b> <b>M20_dimer superfamily</b> <b>TFR_dimer superfamily</b></p>                  | 25 | 100%  | N-term  |    |
| IPI00020559 | <p>IPI00020559 - FAM76A Isoform 3 of Protein FAM76A ENSG00000009780</p> <p>Query seq. </p>                                                                                                                                                         | 8  | 100%  | N-term  |  |
| IPI00013830 | <p>IPI00013830 - SNW1 SNW domain-containing protein 1 ENSG00000100603</p> <p>Query seq. </p> <p>Superfamilies <b>SKIP_SNW superfamily</b></p>                                                                                                      | 28 | 100%  | N-term  |  |
| IPI00464999 | <p>IPI00464999 - HEATR6 HEAT repeat containing 6 ENSG00000068097</p> <p>Query seq. </p>                                                                                                                                                            | 21 | 0%    | Unclear |  |
| IPI00844449 | <p>IPI00844449 - MICAL1 118 kDa protein ENSG00000135596</p> <p>Query seq. </p> <p>Specific hits <b>CH</b></p> <p>Superfamilies <b>CH superfamily</b> <b>CH sup</b></p> <p>Multi-domains <b>FRO_D1</b></p>                                          | 25 | 0%    | Unclear |  |
| IPI00000279 | <p>IPI00000279 - ZC3H15 erythropoietin 4 immediate early response ENSG00000065548</p> <p>Query seq. </p> <p>Superfamilies <b>ZNF_C3H1</b></p> <p>Multi-domains <b>COG5252</b></p>                                                                  | 23 | 0%    | Unclear |  |

|             |                                                                                                                                                                                                                                                                          |    |    |         |  |
|-------------|--------------------------------------------------------------------------------------------------------------------------------------------------------------------------------------------------------------------------------------------------------------------------|----|----|---------|--|
| IPI0010088  | <p>IPI0010088 - HDAC4 Histone deacetylase 4 ENSG00000068024</p> <p>Query seq. </p> <p>Superfamilies </p> <p>Multi-domains</p>                                                                                                                                            | 18 | 0% | Unclear |  |
| IPI00375578 | <p>IPI00375578 - SASS6 Spindle assembly abnormal protein 6 homolog ENSG00000156876</p> <p>Query seq. </p> <p>Multi-domains </p>                                                                                                                                          | 18 | 0% | Unclear |  |
| IPI00787531 | <p>IPI00787531 - GAK similar to Cyclin G-associated kinase ENSG00000178950</p> <p>Query seq. </p> <p>ATP binding pocket <br/> catalytic loop <br/> activation loop <br/> substrate binding pocket </p> <p>Specific hits </p> <p>Superfamilies </p> <p>Multi-domains </p> | 15 | 0% | Unclear |  |
| IPI00143753 | <p>IPI00143753 - SR140 Isoform 1 of U2-associated protein SR140 ENSG00000163714</p> <p>Query seq. </p> <p>Superfamilies </p>                                                                                                                                             | 23 | 0% | Unclear |  |
| IPI00216675 | <p>IPI00216675 - CASP7 Isoform Alpha' of Caspase-7 precursor ENSG00000165806</p> <p>Query seq. </p> <p>substrate pocket <br/> active site <br/> proteolytic cleavage site <br/> dimer interface </p> <p>Specific hits </p> <p>Superfamilies </p>                         | 22 | 0% | Unclear |  |
| IPI00103419 | <p>IPI00103419 - SF4 Isoform 1 of Splicing factor 4 ENSG00000105705</p> <p>Query seq. </p> <p>Superfamilies </p>                                                                                                                                                         | 14 | 0% | Unclear |  |
| IPI00296772 | <p>IPI00296772 - GGA2 ADP-ribosylation factor-binding protein GGA2 ENSG00000103365</p> <p>Query seq. </p> <p>SH3-inter-dileucine motif interaction site <br/> SH3-interprotein binding site </p> <p>Specific hits </p> <p>Superfamilies </p>                             | 14 | 0% | Unclear |  |
| IPI00170778 | <p>IPI00170778 - FNBP4 Formin-binding protein 4 ENSG00000109920</p> <p>Query seq. </p> <p>binding pocket <br/> binding pocket </p> <p>Specific hits </p> <p>Superfamilies </p>                                                                                           | 19 | 0% | Unclear |  |
| IPI00465275 | <p>IPI00465275 - RANBP9 Isoform 1 of Ran-binding protein 9 ENSG00000010017</p> <p>Query seq. </p> <p>Superfamilies </p>                                                                                                                                                  | 10 | 0% | Unclear |  |
| IPI00647635 | <p>IPI00647635 - TNRC15 Isoform 3 of PERQ amino acid-rich with GYG domain-containing protein 2 ENSG00000204120</p> <p>Query seq. </p> <p>proline binding motif <br/> proline interaction residues </p> <p>Specific hits </p> <p>Superfamilies </p>                       | 9  | 0% | Unclear |  |

|                    |                                                                                                                                                                                                                                                                                                                                                                                                                                                                                                                                                                     |           |           |                |                |                                                                                       |
|--------------------|---------------------------------------------------------------------------------------------------------------------------------------------------------------------------------------------------------------------------------------------------------------------------------------------------------------------------------------------------------------------------------------------------------------------------------------------------------------------------------------------------------------------------------------------------------------------|-----------|-----------|----------------|----------------|---------------------------------------------------------------------------------------|
| <p>IPI00021766</p> | <p>IPI00021766 - RTN4 Isoform 1 of Reticulon-4 ENSG00000115310</p>  <p>Query seq. </p> <p>Superfamilies <b>Reticulon superfamily</b></p>                                                                                                                                                                                                                                                          | <p>8</p>  | <p>0%</p> | <p>Unclear</p> |                |     |
| <p>IPI00020873</p> | <p>IPI00020873 - TBL1Y F-box-like/WD repeat-containing protein TBL1Y ENSG00000092377</p>  <p>Query seq. </p> <p>Specific hits <b>WD40</b></p> <p>Superfamilies <b>WD40 superfamily</b></p> <p>Multi-domains <b>eIF2A</b></p>                                                                                                                                                                      | <p>17</p> | <p>0%</p> | <p>Unclear</p> |                |    |
| <p>IPI00424460</p> | <p>IPI00424460 - ZFYVE16 Isoform 1 of Zinc finger FYVE domain-containing protein 16 ENSG00000039319</p>  <p>Query seq. </p> <p>Specific hits <b>FYVE</b></p> <p>Superfamilies <b>FYVE</b></p>                                                                                                                                                                                                     | <p>18</p> | <p>0%</p> | <p>Unclear</p> |                |    |
| <p>IPI00013877</p> | <p>IPI00013877 - HNRPH3 Isoform 1 of Heterogeneous nuclear ribonucleoprotein H3 ENSG00000096746</p>  <p>Query seq. </p> <p>Superfamilies <b>RRM_1 superfamily</b></p>                                                                                                                                                                                                                             | <p>11</p> | <p>0%</p> | <p>Unclear</p> |                |    |
| <p>IPI00746835</p> | <p>IPI00746835 - GIT2 Uncharacterized protein GIT2 ENSG00000139436</p>  <p>Query seq. </p> <p>Specific hits <b>ANK</b></p> <p>Superfamilies <b>RRM superfamily</b></p> <p>Multi-domains <b>ANK superfamily</b>, <b>RRM superfamily</b>, <b>GIT_SH</b></p>                                                                                                                                         | <p>10</p> | <p>0%</p> | <p>Unclear</p> | <p>DQPD391</p> |    |
| <p>IPI00514648</p> | <p>IPI00514648 - SMARCA2 SWI/SNF-related matrix-associated actin-dependent regulator of chromatin a2 isoform a ENSG00000080503</p>  <p>Query seq. </p> <p>Specific hits <b>DEXHC</b></p> <p>Superfamilies <b>HELIC super</b></p> <p>Multi-domains <b>DEXHC</b>, <b>HELIC super</b>, <b>SNF_2_N</b></p>                                                                                        | <p>9</p>  | <p>0%</p> | <p>Unclear</p> |                |   |
| <p>IPI00030399</p> | <p>IPI00030399 - BNIP2 BCL2/adenovirus E1B 19 kDa protein-interacting protein 2 ENSG00000140299</p>  <p>Query seq. </p> <p>Specific hits <b>SEC14</b></p> <p>Superfamilies <b>SEC14 superfamily</b></p>                                                                                                                                                                                       | <p>17</p> | <p>0%</p> | <p>Unclear</p> |                |  |
| <p>IPI00027790</p> | <p>IPI00027790 - AMMECR1L AMMECR1-like protein ENSG00000144233</p>  <p>Query seq. </p> <p>Superfamilies <b>AMMECR1 superfamily</b></p>                                                                                                                                                                                                                                                        | <p>12</p> | <p>0%</p> | <p>Unclear</p> |                |  |
| <p>IPI00027269</p> | <p>IPI00027269 - CBL E3 ubiquitin-protein ligase CBL ENSG00000110395</p>  <p>Query seq. </p> <p>Specific hits <b>RING</b></p> <p>Superfamilies <b>Cbl_N superfamily</b>, <b>Cbl_M2 superfamily</b>, <b>Cbl_M3 superfamily</b>, <b>RING super</b></p> <p>Multi-domains <b>Cbl_N superfamily</b>, <b>Cbl_M2 superfamily</b>, <b>Cbl_M3 superfamily</b>, <b>RING super</b>, <b>UBR super</b></p> | <p>9</p>  | <p>0%</p> | <p>Unclear</p> |                |  |
| <p>IPI00220302</p> | <p>IPI00220302 - WTAP Isoform 1 of Wilms tumor 1-associating protein ENSG00000146457</p>  <p>Query seq. </p> <p>... No conserved domains have been identified for this query sequence ...</p>                                                                                                                                                                                                 | <p>9</p>  | <p>0%</p> | <p>Unclear</p> |                |  |

|             |                                                                                                                                                                                                                                                                                                                            |    |       |         |         |                                                                                       |
|-------------|----------------------------------------------------------------------------------------------------------------------------------------------------------------------------------------------------------------------------------------------------------------------------------------------------------------------------|----|-------|---------|---------|---------------------------------------------------------------------------------------|
| IPI00375793 | <p>IPI00375793 - RGP4 Similar to Ran-binding protein 2 ENSG00000196862</p> <p>Query seq. 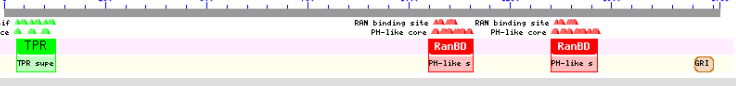</p> <p>Specific hits: TPR superfamily, RanBD, RanBD, GR1</p> <p>Superfamilies: TPR superfamily, RanBD, RanBD, GR1</p>                           | 11 | 0%    | Unclear |         |     |
| IPI00002208 | <p>IPI00002208 - STAMBPL1 Isoform 2 of AMSH-like protease ENSG00000138134</p> <p>Query seq. </p> <p>Superfamilies: Mov34 superfamily</p>                                                                                                  | 8  | 0%    | Unclear |         |    |
| IPI00168084 | <p>IPI00168084 - USP38 Ubiquitin carboxyl-terminal hydrolase 38 ENSG00000170185</p> <p>Query seq. </p> <p>Superfamilies: Peptidase_C19 superfamily, Peptidase_C19 superfamily</p>                                                         | 8  | 0%    | Unclear |         |    |
| IPI00297455 | <p>IPI00297455 - AKAP8L A-kinase anchor protein 8-like ENSG00000011243</p> <p>Query seq. </p> <p>Superfamilies: AKAP95 superfamily</p>                                                                                                    | 8  | 0%    | Unclear |         |    |
| IPI00007306 | <p>IPI00007306 - CFPD1 Isoform 1 of Craniofacial development protein 1 ENSG00000153774</p> <p>Query seq. </p> <p>Superfamilies: BCNT superfamily</p>                                                                                      | 10 | 0%    | Unclear |         |    |
| IPI00760958 | <p>IPI00760958 - FLJ36874 CDNA FLJ36874 fis, clone ASTRO2018169, weakly similar to Oocyte-specific protein P100 ENSG00000166889</p> <p>Query seq. </p> <p>... No conserved domains have been identified for this query sequence ...</p> | 17 | 30%   | Unclear |         |   |
| IPI00431127 | <p>IPI00431127 - CCNK cyclin K isoform 1 ENSG00000090061</p> <p>Query seq. </p> <p>Specific hits: CYCLIN, CYCLIN</p> <p>Superfamilies: CYCLIN superfamily, CYCLIN superfamily</p>                                                       | 28 | 50%   | Unclear | DATD395 |  |
| IPI00410657 | <p>IPI00410657 - RNMT Isoform 2 of mRNA cap guanine-N7 methyltransferase ENSG00000101654</p> <p>Query seq. </p> <p>Superfamilies: Methyltransf_11 superfamily</p>                                                                       | 16 | 50%   | Unclear |         |  |
| IPI00328200 | <p>IPI00328200 - QRICH1 Glutamine-rich protein 1 ENSG00000198218</p> <p>Query seq. </p> <p>... No conserved domains have been identified for this query sequence ...</p>                                                                | 18 | 55.5% | Unclear |         |  |
| IPI00002647 | <p>IPI00002647 - WASF4 Wiskott-Aldrich syndrome protein family member 4 ENSG00000188459</p> <p>Query seq. </p> <p>... No conserved domains have been identified for this query sequence ...</p>                                         | 15 | 66.6% | Unclear |         |  |

|                    |                                                                                                                                                                                                                                                              |           |              |                |                |                                                                                       |
|--------------------|--------------------------------------------------------------------------------------------------------------------------------------------------------------------------------------------------------------------------------------------------------------|-----------|--------------|----------------|----------------|---------------------------------------------------------------------------------------|
| <p>IPI00478260</p> | <p>IPI00478260 - NMT2 Glycylpeptide N-tetradecanoyltransferase ENSG00000152465</p> 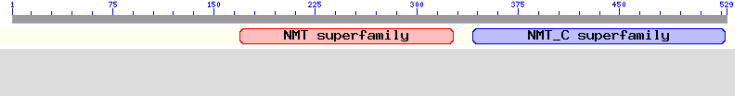 <p>Query seq. Superfamilies</p>                                                         | <p>23</p> | <p>75%</p>   | <p>Unclear</p> |                |     |
| <p>IPI00012093</p> | <p>IPI00012093 - STK25 Serine/threonine-protein kinase 25 ENSG00000115694</p>  <p>Query seq. Specific hits Superfamilies Multi-domains</p>                                  | <p>27</p> | <p>76.9%</p> | <p>Unclear</p> |                |    |
| <p>IPI00216046</p> | <p>IPI00216046 - SMARCA1 Isoform 1 of Probable global transcription activator SNF2L1 ENSG00000102038</p>  <p>Query seq. Specific hits Superfamilies Multi-domains</p>       | <p>13</p> | <p>100%</p>  | <p>Unclear</p> |                |    |
| <p>IPI00032808</p> | <p>IPI00032808 - RAB3D Ras-related protein Rab-3D ENSG00000105514</p>  <p>Query seq. Specific hits Superfamilies</p>                                                        | <p>12</p> | <p>100%</p>  | <p>Unclear</p> |                |    |
| <p>IPI00019463</p> | <p>IPI00019463 - EIF2AK2 Interferon-induced, double-stranded RNA-activated protein kinase ENSG00000055332</p>  <p>Query seq. Specific hits Superfamilies Multi-domains</p> | <p>15</p> | <p>100%</p>  | <p>Unclear</p> |                |   |
| <p>IPI00020719</p> | <p>IPI00020719 - VISA Isoform 1 of Mitochondrial antiviral-signaling protein ENSG00000088888</p> <p>... No conserved domains have been identified for this query sequence ...</p>                                                                            | <p>17</p> | <p>100%</p>  | <p>Unclear</p> | <p>SQVD429</p> |  |
| <p>IPI00018798</p> | <p>IPI00018798 - DNAJC17 DnaJ homolog subfamily C member 17 ENSG00000104129</p>  <p>Query seq. Superfamilies</p>                                                          | <p>24</p> | <p>100%</p>  | <p>Unclear</p> |                |  |
| <p>IPI00005055</p> | <p>IPI00005055 - CXorf56 UPF0428 protein CXorf56 ENSG00000018610</p> <p>... No conserved domains have been identified for this query sequence ...</p>                                                                                                        | <p>29</p> | <p>100%</p>  | <p>Unclear</p> |                |  |
| <p>IPI00386122</p> | <p>IPI00386122 - MOBKL3 Isoform 1 of Preimplantation protein 3 ENSG00000115540</p>  <p>Query seq. Superfamilies</p>                                                       | <p>16</p> | <p>100%</p>  | <p>Unclear</p> | <p>DEMD34</p>  |  |
