# Supplementary material
Source: PubMed Central journal article supplement (PMC2597167)
Supplement: NIHMS67899-supplement-04.pdf [file NIHMS67899-supplement-04.pdf]

| Description            | Parent degradation rate | Fragment(s) stability | 2hr | 4hr | 6hr |
|------------------------|-------------------------|-----------------------|-----|-----|-----|
| IPI00168165 - CLASP2   | Rapid                   | Stable                |     |     |     |
| IPI00215888 - SRP72    | Rapid                   | Stable                |     |     |     |
| IPI00166555 - RBM26    | Rapid                   | Stable                |     |     |     |
| IPI00294744 - PARN     | Rapid                   | Stable                |     |     |     |
| IPI00304577 - AP2A1    | Rapid                   | Stable                |     |     |     |
| IPI00384541 - KIAA0460 | Rapid                   | Stable                |     |     |     |
| IPI00746655 - FAM62A   | Rapid                   | Stable                |     |     |     |
| IPI00013788 - HTATSF1  | Rapid                   | Stable                |     |     |     |

|                       |       |        |  |  |  |
|-----------------------|-------|--------|--|--|--|
| IPI00418471 - VIM     | Rapid | Stable |  |  |  |
| IPI00028957 - UBE4A   | Rapid | Stable |  |  |  |
| IPI00026969 - SEC23IP | Rapid | Stable |  |  |  |
| IPI00003168 - PRPSAP2 | Rapid | Stable |  |  |  |
| IPI00025815 - TARDBP  | Rapid | Stable |  |  |  |
| IPI00292753 - GAPVD1  | Rapid | Stable |  |  |  |
| IPI00009771 - LMNB2   | Rapid | Stable |  |  |  |
| IPI00479760 - AAK1    | Rapid | Stable |  |  |  |

|                        |       |        |                                                                                                                                                                                        |                                                                                                                                                                                         |                                                                                                                                                                                          |
|------------------------|-------|--------|----------------------------------------------------------------------------------------------------------------------------------------------------------------------------------------|-----------------------------------------------------------------------------------------------------------------------------------------------------------------------------------------|------------------------------------------------------------------------------------------------------------------------------------------------------------------------------------------|
| IPI00465160 - ABCF3    | Rapid | Stable | 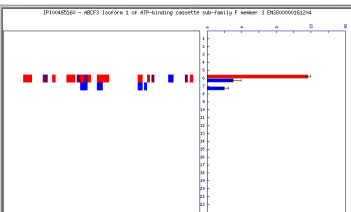 <p>IPI00465160 - ABCF3 Isoform 1 of ATP-binding cassette sub-family F member 3 EN0000001204</p>       |  <p>IPI00465160 - ABCF3 Isoform 2 of ATP-binding cassette sub-family F member 3 EN0000001204</p>       |  <p>IPI00465160 - ABCF3 Isoform 3 of ATP-binding cassette sub-family F member 3 EN0000001204</p>       |
| IPI00026156 - HCLS1    | Rapid | Stable |  <p>IPI00026156 - HCLS1 Hematopoietic lineage cell-specific protein EN0000002050</p>                  |  <p>IPI00026156 - HCLS1 Hematopoietic lineage cell-specific protein EN0000002050</p>                  |  <p>IPI00026156 - HCLS1 Hematopoietic lineage cell-specific protein EN0000002050</p>                  |
| IPI00328911 - HECTD1   | Rapid | Stable |  <p>IPI00328911 - HECTD1 E3 ubiquitin-protein ligase HECTD1 EN0000002140</p>                          |  <p>IPI00328911 - HECTD1 E3 ubiquitin-protein ligase HECTD1 EN0000002140</p>                          |  <p>IPI00328911 - HECTD1 E3 ubiquitin-protein ligase HECTD1 EN0000002140</p>                          |
| IPI00011488 - STK4     | Rapid | Stable |  <p>IPI00011488 - STK4 Isoform 1 of Serine/threonine-protein kinase 4 EN0000001110</p>                |  <p>IPI00011488 - STK4 Isoform 2 of Serine/threonine-protein kinase 4 EN0000001110</p>                |  <p>IPI00011488 - STK4 Isoform 3 of Serine/threonine-protein kinase 4 EN0000001110</p>                |
| IPI00183002 - PPP1R12A | Rapid | Stable |  <p>IPI00183002 - PPP1R12 Isoform 1 of Protein phosphatase 1 regulatory subunit 12A EN0000002072</p> |  <p>IPI00183002 - PPP1R12 Isoform 2 of Protein phosphatase 1 regulatory subunit 12A EN0000002072</p> |  <p>IPI00183002 - PPP1R12 Isoform 3 of Protein phosphatase 1 regulatory subunit 12A EN0000002072</p> |
| IPI00005715 - UBE4B    | Rapid | Stable |  <p>IPI00005715 - UBE4B Isoform 1 of Ubiquitin-conjugation factor E4 B EN0000003939</p>             |  <p>IPI00005715 - UBE4B Isoform 2 of Ubiquitin-conjugation factor E4 B EN0000003939</p>             |  <p>IPI00005715 - UBE4B Isoform 3 of Ubiquitin-conjugation factor E4 B EN0000003939</p>             |
| IPI00015952 - EIF4G2   | Rapid | Stable |  <p>IPI00015952 - EIF4G2 Eukaryotic translation initiation factor 4 gamma 2 EN0000001032</p>        |  <p>IPI00015952 - EIF4G2 Eukaryotic translation initiation factor 4 gamma 2 EN0000001032</p>        |  <p>IPI00015952 - EIF4G2 Eukaryotic translation initiation factor 4 gamma 2 EN0000001032</p>        |
| IPI00514468 - MACF1    | Rapid | Stable |  <p>IPI00514468 - MACF1 cilia tip protein EN0000002760</p>                                          |  <p>IPI00514468 - MACF1 cilia tip protein EN0000002760</p>                                          |  <p>IPI00514468 - MACF1 cilia tip protein EN0000002760<br/>has potential site of cleavage!</p>      |

|                       |       |        |  |  |  |
|-----------------------|-------|--------|--|--|--|
| IPI00305545 - DBR1    | Rapid | Stable |  |  |  |
| IPI00301051 - NHLRC2  | Rapid | Stable |  |  |  |
| IPI00376317 - EDC4    | Rapid | Stable |  |  |  |
| IPI00073110 - FYB     | Rapid | Stable |  |  |  |
| IPI00641659 - ROCK1   | Rapid | Stable |  |  |  |
| IPI00306127 - THUMPD3 | Rapid | Stable |  |  |  |
| IPI00555719 - SATB1   | Rapid | Stable |  |  |  |
| IPI00290460 - EIF3G   | Rapid | Stable |  |  |  |

|                        |       |        |  |  |  |
|------------------------|-------|--------|--|--|--|
| IPI00419979 - PAK2     | Rapid | Stable |  |  |  |
| IPI00024255 - GPKOW    | Rapid | Stable |  |  |  |
| IPI00291570 - CASP2    | Rapid | Stable |  |  |  |
| IPI00550821 - FLJ12529 | Rapid | Stable |  |  |  |
| IPI00215768 - GCLC     | Rapid | Stable |  |  |  |
| IPI00794135 - SPTBN1   | Rapid | Stable |  |  |  |
| IPI00397834 - URP2     | Rapid | Stable |  |  |  |
| IPI00006164 - ILKAP    | Rapid | Stable |  |  |  |

|                       |       |        |  |  |  |
|-----------------------|-------|--------|--|--|--|
| IPI00646377 - EIF4G3  | Rapid | Stable |  |  |  |
| IPI00298520 - ARCNI   | Rapid | Stable |  |  |  |
| IPI00028275 - CKAP5   | Rapid | Stable |  |  |  |
| IPI00303882 - M6PRBP1 | Rapid | Stable |  |  |  |
| IPI00844315 - RCDSD1  | Rapid | Stable |  |  |  |
| IPI00299254 - EIF5B   | Rapid | Stable |  |  |  |
| IPI00220365 - EIF4G1  | Rapid | Stable |  |  |  |
| IPI00015262 - CNN2    | Rapid | Stable |  |  |  |

|                        |       |        |                                                                                                         |                                                                                                         |                                                                                                                                            |
|------------------------|-------|--------|---------------------------------------------------------------------------------------------------------|---------------------------------------------------------------------------------------------------------|--------------------------------------------------------------------------------------------------------------------------------------------|
| IPI00439415 - EIF4B    | Rapid | Stable | <p>IPI00439415 - EIF4B eukaryotic translation initiation factor 4B (EN0000000046)</p>                   | <p>IPI00439415 - EIF4B eukaryotic translation initiation factor 4B (EN0000000046)</p>                   | <p>IPI00439415 - EIF4B eukaryotic translation initiation factor 4B (EN0000000046)<br/>No potential site-of-cleavage!</p>                   |
| IPI00163230 - COPS6    | Rapid | Stable | <p>IPI00163230 - COPS6 COP9 signalosome complex subunit 6 (EN0000000896)</p>                            | <p>IPI00163230 - COPS6 COP9 signalosome complex subunit 6 (EN0000000896)</p>                            | <p>IPI00163230 - COPS6 COP9 signalosome complex subunit 6 (EN0000000896)</p>                                                               |
| IPI00294962 - SH3KBP1  | Rapid | Stable | <p>IPI00294962 - SH3KBP1 Isoform 1 of SH3 domain-containing kinase-binding protein 1 (EN0000004700)</p> | <p>IPI00294962 - SH3KBP1 Isoform 1 of SH3 domain-containing kinase-binding protein 1 (EN0000004700)</p> | <p>IPI00294962 - SH3KBP1 Isoform 1 of SH3 domain-containing kinase-binding protein 1 (EN0000004700)<br/>No potential site-of-cleavage!</p> |
| IPI00301609 - NEK9     | Rapid | Stable | <p>IPI00301609 - NEK9 Serine/threonine-protein kinase NEK9 (EN0000011900)</p>                           | <p>IPI00301609 - NEK9 Serine/threonine-protein kinase NEK9 (EN0000011900)</p>                           | <p>IPI00301609 - NEK9 Serine/threonine-protein kinase NEK9 (EN0000011900)</p>                                                              |
| IPI00386516 - KIAA0174 | Rapid | Stable | <p>IPI00386516 - KIAA0174 KIAA0174 protein (EN0000000200)</p>                                           | <p>IPI00386516 - KIAA0174 KIAA0174 protein (EN0000000200)</p>                                           | <p>IPI00386516 - KIAA0174 KIAA0174 protein (EN0000000200)</p>                                                                              |
| IPI00642862 - PP1L4    | Rapid | Stable | <p>IPI00642862 - PP1L4 Partially-orthologous co-ortholog (EN0000000200)</p>                             | <p>IPI00642862 - PP1L4 Partially-orthologous co-ortholog (EN0000000200)</p>                             | <p>IPI00642862 - PP1L4 Partially-orthologous co-ortholog (EN0000000200)<br/>No potential site-of-cleavage!</p>                             |
| IPI00644386 - FUBP1    | Rapid | Stable | <p>IPI00644386 - FUBP1 Isoform 2 of FcR upstream element-binding protein 1 (EN0000000200)</p>           | <p>IPI00644386 - FUBP1 Isoform 2 of FcR upstream element-binding protein 1 (EN0000000200)</p>           | <p>IPI00644386 - FUBP1 Isoform 2 of FcR upstream element-binding protein 1 (EN0000000200)</p>                                              |
| IPI00745092 - SPTAN1   | Rapid | Stable | <p>IPI00745092 - SPTAN1 Spinal and hippocampal tumor-associated protein (SPTAN) (EN0000000200)</p>      | <p>IPI00745092 - SPTAN1 Spinal and hippocampal tumor-associated protein (SPTAN) (EN0000000200)</p>      | <p>IPI00745092 - SPTAN1 Spinal and hippocampal tumor-associated protein (SPTAN) (EN0000000200)<br/>No potential site-of-cleavage!</p>      |

|                       |       |              |  |  |  |
|-----------------------|-------|--------------|--|--|--|
| IPI00749082 - NMT1    | Rapid | Stable       |  |  |  |
| IPI00396387 - GNL1    | Rapid | Intermediate |  |  |  |
| IPI00302829 - RB1     | Rapid | Intermediate |  |  |  |
| IPI00397904 - NUP93   | Rapid | Intermediate |  |  |  |
| IPI00396279 - CLASP1  | Rapid | Intermediate |  |  |  |
| IPI00514175 - CDC123  | Rapid | Intermediate |  |  |  |
| IPI00413942 - GRIPAP1 | Rapid | Intermediate |  |  |  |
| IPI00009542 - MAGED2  | Rapid | Intermediate |  |  |  |



|                       |       |              |  |  |  |
|-----------------------|-------|--------------|--|--|--|
| IPI00299507 - NCAPH   | Rapid | Intermediate |  |  |  |
| IPI00016868 - TELO2   | Rapid | Intermediate |  |  |  |
| IPI00009315 - ACBD3   | Rapid | Intermediate |  |  |  |
| IPI00016621 - AP2A2   | Rapid | Intermediate |  |  |  |
| IPI00163849 - EPS15L1 | Rapid | Intermediate |  |  |  |
| IPI00433169 - ARHGEF1 | Rapid | Intermediate |  |  |  |
| IPI00298935 - JMJD1B  | Rapid | Intermediate |  |  |  |
| IPI00655885 - TDP1    | Rapid | Intermediate |  |  |  |

|                      |       |              |  |  |  |
|----------------------|-------|--------------|--|--|--|
| IPI00334683 - GAMT   | Rapid | Intermediate |  |  |  |
| IPI00303292 - KPNA1  | Rapid | Intermediate |  |  |  |
| IPI00748353 - WDHD1  | Rapid | Intermediate |  |  |  |
| IPI00647655 - POLA1  | Rapid | Intermediate |  |  |  |
| IPI00299095 - SNX2   | Rapid | Intermediate |  |  |  |
| IPI00410287 - PRKAA1 | Rapid | Intermediate |  |  |  |
| IPI00005154 - SSRP1  | Rapid | Intermediate |  |  |  |
| IPI00291783 - GEMIN5 | Rapid | Intermediate |  |  |  |

|                         |       |              |  |  |  |
|-------------------------|-------|--------------|--|--|--|
| IPI00478758 - C10orf119 | Rapid | Intermediate |  |  |  |
| IPI00010252 - TRIM33    | Rapid | Intermediate |  |  |  |
| IPI00221394 - DKC1      | Rapid | Intermediate |  |  |  |
| IPI00744648 - SPAG9     | Rapid | Intermediate |  |  |  |
| IPI00402008 - SAPS1     | Rapid | Intermediate |  |  |  |
| IPI00016912 - TTC1      | Rapid | Intermediate |  |  |  |
| IPI00386803 - LASP1     | Rapid | Intermediate |  |  |  |
| IPI00029822 - SMARCA4   | Rapid | Intermediate |  |  |  |

|                       |       |              |                                                                                                               |                                                                                                                           |                                                                                                                           |
|-----------------------|-------|--------------|---------------------------------------------------------------------------------------------------------------|---------------------------------------------------------------------------------------------------------------------------|---------------------------------------------------------------------------------------------------------------------------|
| IPI00853400 - FKBP15  | Rapid | Intermediate | <p>IPI00853400 - FKBP15 isoform 1 of F09-binding protein 15 (EN0000013302)</p>                                | <p>IPI00853400 - FKBP15 isoform 1 of F09-binding protein 15 (EN0000013302)</p>                                            | <p>IPI00853400 - FKBP15 isoform 1 of F09-binding protein 15 (EN0000013302)</p>                                            |
| IPI00026940 - NUP50   | Rapid | Intermediate | <p>IPI00026940 - NUP50 Nucleoporin in 50 kb (EN0000009300)</p>                                                | <p>IPI00026940 - NUP50 Nucleoporin in 50 kb (EN0000009300)</p>                                                            | <p>IPI00026940 - NUP50 Nucleoporin in 50 kb (EN0000009300)</p>                                                            |
| IPI00645431 - BAT3    | Rapid | Intermediate | <p>IPI00645431 - BAT3 NUP50 associated transcript 3 (EN0000020443)</p>                                        | <p>IPI00645431 - BAT3 NUP50 associated transcript 3 (EN0000020443)</p>                                                    | <p>IPI00645431 - BAT3 NUP50 associated transcript 3 (EN0000020443)<br/> <i>No potential sites of cleavage!</i></p>        |
| IPI00783378 - UBE2O   | Rapid | Intermediate | <p>IPI00783378 - UBE2O ubiquitin-conjugating protein UBE2O (EN0000017931)</p>                                 | <p>IPI00783378 - UBE2O ubiquitin-conjugating protein UBE2O (EN0000017931)<br/> <i>No potential sites of cleavage!</i></p> | <p>IPI00783378 - UBE2O ubiquitin-conjugating protein UBE2O (EN0000017931)<br/> <i>No potential sites of cleavage!</i></p> |
| IPI00031517 - MCM6    | Rapid | Intermediate | <p>IPI00031517 - MCM6 DNA replication licensing factor MCM6 (EN0000000500)</p>                                | <p>IPI00031517 - MCM6 DNA replication licensing factor MCM6 (EN0000000500)</p>                                            | <p>IPI00031517 - MCM6 DNA replication licensing factor MCM6 (EN0000000500)</p>                                            |
| IPI00785113 - LRRFIP1 | Rapid | Intermediate | <p>IPI00785113 - LRRFIP1 isoform 1 of Leucine-rich repeat fligitoxin-interacting protein 1 (EN0000012401)</p> | <p>IPI00785113 - LRRFIP1 isoform 1 of Leucine-rich repeat fligitoxin-interacting protein 1 (EN0000012401)</p>             | <p>IPI00785113 - LRRFIP1 isoform 1 of Leucine-rich repeat fligitoxin-interacting protein 1 (EN0000012401)</p>             |
| IPI00013160 - LGTN    | Rapid | Intermediate | <p>IPI00013160 - LGTN isoform 1 of Ligatin (EN0000004386)</p>                                                 | <p>IPI00013160 - LGTN isoform 1 of Ligatin (EN0000004386)</p>                                                             | <p>IPI00013160 - LGTN isoform 1 of Ligatin (EN0000004386)</p>                                                             |
| IPI00719725 - SAPS3   | Rapid | Intermediate | <p>IPI00719725 - SAPS3 isoform 5 of SAP domain family member 3 (EN0000013073)</p>                             | <p>IPI00719725 - SAPS3 isoform 5 of SAP domain family member 3 (EN0000013073)</p>                                         | <p>IPI00719725 - SAPS3 isoform 5 of SAP domain family member 3 (EN0000013073)</p>                                         |

|                       |       |              |                                                                                     |                                                                                      |                                                                                       |
|-----------------------|-------|--------------|-------------------------------------------------------------------------------------|--------------------------------------------------------------------------------------|---------------------------------------------------------------------------------------|
| IPI00292134 - EPS15   | Rapid | Intermediate | 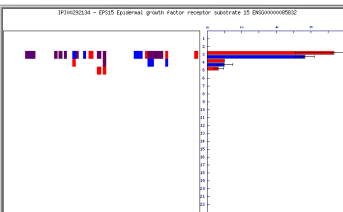    |     |     |
| IPI00022254 - ATG3    | Rapid | Intermediate |    |    |    |
| IPI00013214 - MCM3    | Rapid | Intermediate |    |    |    |
| IPI00101734 - FAM105B | Rapid | Intermediate |    |    |    |
| IPI00607554 - USP47   | Rapid | Intermediate |   |   |   |
| IPI00012773 - MTA1    | Rapid | Intermediate |  |  |  |
| IPI00219676 - DNTT    | Rapid | Intermediate |  |  |  |
| IPI00004671 - GOLGB1  | Rapid | Intermediate |  |  |  |

|                      |       |              |  |  |  |
|----------------------|-------|--------------|--|--|--|
| IPI00002255 - LRBA   | Rapid | Intermediate |  |  |  |
| IPI00022820 - GTF2B  | Rapid | Intermediate |  |  |  |
| IPI00026928 - GRAP2  | Rapid | Intermediate |  |  |  |
| IPI00102670 - FNBP1  | Rapid | Intermediate |  |  |  |
| IPI00221325 - RANBP2 | Rapid | Intermediate |  |  |  |
| IPI00305267 - GOLGA3 | Rapid | Intermediate |  |  |  |
| IPI00328753 - KTN1   | Rapid | Intermediate |  |  |  |
| IPI00855998 - CENPF  | Rapid | Intermediate |  |  |  |

|                       |       |           |  |  |  |
|-----------------------|-------|-----------|--|--|--|
| IPI00465428 - VPS13C  | Rapid | Transient |  |  |  |
| IPI00002135 - TACC3   | Rapid | Transient |  |  |  |
| IPI00019205 - C14orf4 | Rapid | Transient |  |  |  |
| IPI00022449 - DOCK2   | Rapid | Transient |  |  |  |
| IPI00411730 - PPP4R1  | Rapid | Transient |  |  |  |
| IPI00030654 - CPSF6   | Rapid | Transient |  |  |  |
| IPI00029754 - MLH1    | Rapid | Transient |  |  |  |
| IPI00640085 - UBR2    | Rapid | Transient |  |  |  |

|                      |       |           |                                                                                                                                                    |                                                                                                                                                     |                                                                                                                                                      |
|----------------------|-------|-----------|----------------------------------------------------------------------------------------------------------------------------------------------------|-----------------------------------------------------------------------------------------------------------------------------------------------------|------------------------------------------------------------------------------------------------------------------------------------------------------|
| IPI00020127 - RPA1   | Rapid | Transient | 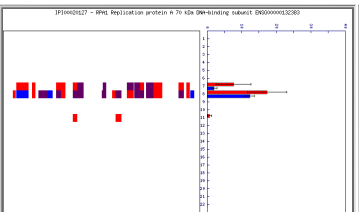 <p>IPI00020127 - RPA1 Isoform 1 of RPA1 (ENSG0000022083)</p>      |  <p>IPI00020127 - RPA1 Isoform 2 of RPA1 (ENSG0000022083)</p>      |  <p>IPI00020127 - RPA1 Isoform 3 of RPA1 (ENSG0000022083)</p>      |
| IPI00220158 - ADD1   | Rapid | Transient |  <p>IPI00220158 - ADD1 Isoform 1 of ADD1 (ENSG0000022124)</p>     |  <p>IPI00220158 - ADD1 Isoform 2 of ADD1 (ENSG0000022124)</p>     |  <p>IPI00220158 - ADD1 Isoform 3 of ADD1 (ENSG0000022124)</p>     |
| IPI00395463 - CHMP7  | Rapid | Transient |  <p>IPI00395463 - CHMP7 Isoform 1 of CHMP7 (ENSG0000022167)</p>   |  <p>IPI00395463 - CHMP7 Isoform 2 of CHMP7 (ENSG0000022167)</p>   |  <p>IPI00395463 - CHMP7 Isoform 3 of CHMP7 (ENSG0000022167)</p>   |
| IPI00746012 - ATPBD4 | Rapid | Transient |  <p>IPI00746012 - ATPBD4 Isoform 1 of ATPBD4 (ENSG0000022196)</p> |  <p>IPI00746012 - ATPBD4 Isoform 2 of ATPBD4 (ENSG0000022196)</p> |  <p>IPI00746012 - ATPBD4 Isoform 3 of ATPBD4 (ENSG0000022196)</p> |
| IPI00292140 - CASP3  | Rapid | Transient |  <p>IPI00292140 - CASP3 Isoform 1 of CASP3 (ENSG0000022207)</p>  |  <p>IPI00292140 - CASP3 Isoform 2 of CASP3 (ENSG0000022207)</p>  |  <p>IPI00292140 - CASP3 Isoform 3 of CASP3 (ENSG0000022207)</p>  |
| IPI00655754 - UFD1L  | Rapid | Transient |  <p>IPI00655754 - UFD1L Isoform 1 of UFD1L (ENSG0000022207)</p> |  <p>IPI00655754 - UFD1L Isoform 2 of UFD1L (ENSG0000022207)</p> |  <p>IPI00655754 - UFD1L Isoform 3 of UFD1L (ENSG0000022207)</p> |
| IPI00293655 - DDX1   | Rapid | None      |  <p>IPI00293655 - DDX1 Isoform 1 of DDX1 (ENSG0000022216)</p>   |  <p>IPI00293655 - DDX1 Isoform 2 of DDX1 (ENSG0000022216)</p>   |  <p>IPI00293655 - DDX1 Isoform 3 of DDX1 (ENSG0000022216)</p>   |
| IPI00412672 - PKN1   | Rapid | None      |  <p>IPI00412672 - PKN1 Isoform 1 of PKN1 (ENSG0000022243)</p>   |  <p>IPI00412672 - PKN1 Isoform 2 of PKN1 (ENSG0000022243)</p>   |  <p>IPI00412672 - PKN1 Isoform 3 of PKN1 (ENSG0000022243)</p>   |



|                      |       |         |  |  |  |
|----------------------|-------|---------|--|--|--|
| IPI00021954 - GBF1   | Rapid | None    |  |  |  |
| IPI0002188 - ARFGEF1 | Rapid | None    |  |  |  |
| IPI00170596 - SIN3A  | Rapid | None    |  |  |  |
| IPI00412441 - WAPAL  | Rapid | None    |  |  |  |
| IPI00290738 - PICALM | Rapid | Unclear |  |  |  |
| IPI00789101 - PTGES3 | Rapid | Unclear |  |  |  |
| IPI00009070 - HBS1L  | Slow  | Stable  |  |  |  |
| IPI00449049 - PARP1  | Slow  | Stable  |  |  |  |

|                       |      |        |  |  |  |
|-----------------------|------|--------|--|--|--|
| IPI00101968 - DBNL    | Slow | Stable |  |  |  |
| IPI00016513 - RAB10   | Slow | Stable |  |  |  |
| IPI00000875 - EEF1G   | Slow | Stable |  |  |  |
| IPI00008575 - KHDRBS1 | Slow | Stable |  |  |  |
| IPI00011913 - HNRNPA0 | Slow | Stable |  |  |  |
| IPI00012442 - G3BP1   | Slow | Stable |  |  |  |
| IPI00022348 - PML     | Slow | Stable |  |  |  |
| IPI00171903 - HNRPM   | Slow | Stable |  |  |  |

|                         |      |        |                                                                                     |                                                                                      |                                                                                       |
|-------------------------|------|--------|-------------------------------------------------------------------------------------|--------------------------------------------------------------------------------------|---------------------------------------------------------------------------------------|
| IPI00215965 - HNRNPA1   | Slow | Stable | 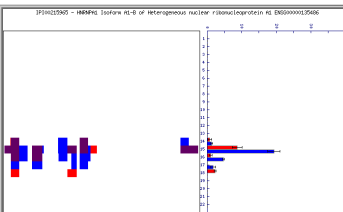    |     |     |
| IPI00216230 - TMPO      | Slow | Stable |    |    |    |
| IPI00216746 - HNRPK     | Slow | Stable |    |    |    |
| IPI00297211 - SMARCA5   | Slow | Stable |    |    |    |
| IPI00301936 - ELAVL1    | Slow | Stable |   |   |   |
| IPI00396378 - HNRNPA2B1 | Slow | Stable |  |  |  |
| IPI00413108 - RPSA      | Slow | Stable |  |  |  |
| IPI00477313 - HNRNPC    | Slow | Stable |  |  |  |

|                       |      |              |  |  |  |
|-----------------------|------|--------------|--|--|--|
| IPI00742905 - DHX9    | Slow | Stable       |  |  |  |
| IPI00746657 - U2AF2   | Slow | Stable       |  |  |  |
| IPI00747447 - EIF3B   | Slow | Stable       |  |  |  |
| IPI00789551 - MATR3   | Slow | Stable       |  |  |  |
| IPI00855957 - KHSRP   | Slow | Stable       |  |  |  |
| IPI00719680 - AP3D1   | Slow | Intermediate |  |  |  |
| IPI00551024 - DAK     | Slow | Intermediate |  |  |  |
| IPI00477531 - DYNC1H1 | Slow | Intermediate |  |  |  |

|                       |      |              |  |  |  |
|-----------------------|------|--------------|--|--|--|
| IPI00744702 - FAM125A | Slow | Intermediate |  |  |  |
| IPI00465294 - CDC5L   | Slow | Intermediate |  |  |  |
| IPI00023344 - SYMPK   | Slow | Intermediate |  |  |  |
| IPI00023785 - DDX17   | Slow | Intermediate |  |  |  |
| IPI00020436 - RAB11B  | Slow | Intermediate |  |  |  |
| IPI00006167 - PPM1G   | Slow | Intermediate |  |  |  |
| IPI00376199 - IRF2BP2 | Slow | Intermediate |  |  |  |
| IPI00054042 - GTF2I   | Slow | Intermediate |  |  |  |

|                         |      |              |  |  |  |
|-------------------------|------|--------------|--|--|--|
| IPI00170935 - LRRC47    | Slow | Intermediate |  |  |  |
| IPI00182757 - KIAA1967  | Slow | Intermediate |  |  |  |
| IPI00217952 - GFPT1     | Slow | Intermediate |  |  |  |
| IPI00642904 - PABPC4    | Slow | Intermediate |  |  |  |
| IPI00794575 - DNM2      | Slow | Intermediate |  |  |  |
| IPI00304596 - NONO      | Slow | Intermediate |  |  |  |
| IPI00742703 - PLCG1     | Slow | Intermediate |  |  |  |
| IPI00086909 - LOC440917 | Slow | Intermediate |  |  |  |

|                        |      |              |  |
|------------------------|------|--------------|--|
| IPI00002624 - PLRG1    | Slow | Intermediate |  |
| IPI00007074 - YARS     | Slow | Intermediate |  |
| IPI00007812 - ATP6V1B2 | Slow | Intermediate |  |
| IPI00012578 - KPNA4    | Slow | Intermediate |  |
| IPI00013452 - EPRS     | Slow | Intermediate |  |
| IPI00015195 - CSTF3    | Slow | Intermediate |  |
| IPI00017451 - SF3A1    | Slow | Intermediate |  |
| IPI00018140 - SYNRIP   | Slow | Intermediate |  |

|                      |      |              |  |  |  |
|----------------------|------|--------------|--|--|--|
| IPI00026219 - CPSF1  | Slow | Intermediate |  |  |  |
| IPI00026337 - RANBP3 | Slow | Intermediate |  |  |  |
| IPI00026665 - QARS   | Slow | Intermediate |  |  |  |
| IPI00031801 - CSDA   | Slow | Intermediate |  |  |  |
| IPI00034049 - UPF1   | Slow | Intermediate |  |  |  |
| IPI00101405 - FDPS   | Slow | Intermediate |  |  |  |
| IPI00165230 - DAZAP1 | Slow | Intermediate |  |  |  |
| IPI00219604 - MAP2K1 | Slow | Intermediate |  |  |  |



|                      |      |              |  |  |  |
|----------------------|------|--------------|--|--|--|
| IPI00221207 - RABL2A | Slow | Intermediate |  |  |  |
| IPI00239406 - SYNE2  | Slow | Intermediate |  |  |  |
| IPI00375144 - ARS2   | Slow | Intermediate |  |  |  |
| IPI00414320 - ANXA11 | Slow | Intermediate |  |  |  |
| IPI00419237 - LAP3   | Slow | Intermediate |  |  |  |
| IPI00438229 - TRIM28 | Slow | Intermediate |  |  |  |
| IPI00455210 - CHD4   | Slow | Intermediate |  |  |  |
| IPI00456681 - SUPT6H | Slow | Intermediate |  |  |  |

|                      |      |              |                                                                                     |                                                                                      |                                                                                       |
|----------------------|------|--------------|-------------------------------------------------------------------------------------|--------------------------------------------------------------------------------------|---------------------------------------------------------------------------------------|
| IPI00479946 - STIP1  | Slow | Intermediate | 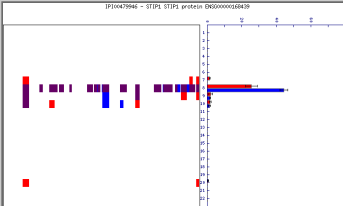   |    |    |
| IPI00646493 - COPA   | Slow | Intermediate |    |    |    |
| IPI00657954 - DDX46  | Slow | Intermediate |    |    |    |
| IPI00744211 - EIF4E2 | Slow | Intermediate |    |    |    |
| IPI00796337 - PCBP2  | Slow | Intermediate |   |   |   |
| IPI00024802 - BTA1F1 | Slow | Transient    |  |  |  |
| IPI00217949 - UBE2S  | Slow | Transient    |  |  |  |
| IPI00001159 - GCN1L1 | Slow | Transient    |  |  |  |

|                        |      |           |  |  |  |
|------------------------|------|-----------|--|--|--|
| IPI00746782 - MPST     | Slow | Transient |  |  |  |
| IPI00221108 - TYMS     | Slow | Transient |  |  |  |
| IPI00003783 - MAP2K2   | Slow | Transient |  |  |  |
| IPI00016532 - C4orf27  | Slow | Transient |  |  |  |
| IPI00020567 - ARHGAP1  | Slow | Transient |  |  |  |
| IPI00028888 - HNRPD    | Slow | Transient |  |  |  |
| IPI00030383 - PPP1R8   | Slow | Transient |  |  |  |
| IPI00036742 - KIAA1429 | Slow | Transient |  |  |  |

|                        |         |              |  |  |  |
|------------------------|---------|--------------|--|--|--|
| IPI00294536 - STRAP    | Slow    | Transient    |  |  |  |
| IPI00465222 - CHD3     | Slow    | Transient    |  |  |  |
| IPI00478230 - RBBP5    | Slow    | Unclear      |  |  |  |
| IPI00007423 - ANP32B   | Slow    | Unclear      |  |  |  |
| IPI00292771 - NUMA1    | Slow    | Unclear      |  |  |  |
| IPI00020991 - CDKN2AIP | Unclear | Intermediate |  |  |  |
| IPI00218918 - ANXA1    | Unclear | Intermediate |  |  |  |
| IPI00845348 - ZRANB2   | Unclear | Intermediate |  |  |  |

|                      |         |              |                                                                                                                        |                                                                                                                        |                                                                                                                        |
|----------------------|---------|--------------|------------------------------------------------------------------------------------------------------------------------|------------------------------------------------------------------------------------------------------------------------|------------------------------------------------------------------------------------------------------------------------|
| IPI00033130 - SAE1   | Unclear | Intermediate | <p>IPI00033130 - SAE1 (SMO-activating enzyme subunit 1) ENEM00004220</p>                                               | <p>IPI00033130 - SAE1 (SMO-activating enzyme subunit 1) ENEM00004220<br/>No potential site-of-cleavage!</p>            | <p>IPI00033130 - SAE1 (SMO-activating enzyme subunit 1) ENEM00004220<br/>No potential site-of-cleavage!</p>            |
| IPI00220991 - AP2B1  | Unclear | Intermediate | <p>IPI00220991 - #2B1 Putative uncharacterized protein (AF237620) ENEM00004625</p>                                     | <p>IPI00220991 - #2B1 Putative uncharacterized protein (AF237620) ENEM00004625</p>                                     | <p>IPI00220991 - #2B1 Putative uncharacterized protein (AF237620) ENEM00004625</p>                                     |
| IPI00844286 - CDC73  | Unclear | Intermediate | <p>IPI00844286 - CDC73 Uncharacterized protein (CC73) ENEM000013471</p>                                                | <p>IPI00844286 - CDC73 Uncharacterized protein (CC73) ENEM000013471</p>                                                | <p>IPI00844286 - CDC73 Uncharacterized protein (CC73) ENEM000013471</p>                                                |
| IPI00386119 - SF1    | Unclear | Intermediate | <p>IPI00386119 - SF1 Isoform 5 of splicing factor 1 ENEM000010064</p>                                                  | <p>IPI00386119 - SF1 Isoform 5 of splicing factor 1 ENEM000010064</p>                                                  | <p>IPI00386119 - SF1 Isoform 5 of splicing factor 1 ENEM000010064</p>                                                  |
| IPI00034006 - PTPN23 | Unclear | Intermediate | <p>IPI00034006 - PTPN23 Tyrosine-protein phosphatase nonreceptor type 23 ENEM000076201</p>                             | <p>IPI00034006 - PTPN23 Tyrosine-protein phosphatase nonreceptor type 23 ENEM000076201</p>                             | <p>IPI00034006 - PTPN23 Tyrosine-protein phosphatase nonreceptor type 23 ENEM000076201</p>                             |
| IPI00183530 - SNX1   | Unclear | Intermediate | <p>IPI00183530 - SNX1 GTPase FLNRC2 FtsA-like domain TEST164064; highly similar to Splicing factor 1 ENEM000010023</p> | <p>IPI00183530 - SNX1 GTPase FLNRC2 FtsA-like domain TEST164064; highly similar to Splicing factor 1 ENEM000010023</p> | <p>IPI00183530 - SNX1 GTPase FLNRC2 FtsA-like domain TEST164064; highly similar to Splicing factor 1 ENEM000010023</p> |
| IPI00305289 - KIF11  | Unclear | Intermediate | <p>IPI00305289 - KIF11 Kinesin-like protein KIF11 ENEM000013026</p>                                                    | <p>IPI00305289 - KIF11 Kinesin-like protein KIF11 ENEM000013026</p>                                                    | <p>IPI00305289 - KIF11 Kinesin-like protein KIF11 ENEM000013026</p>                                                    |
| IPI00828021 - HSPA4L | Unclear | Intermediate | <p>IPI00828021 - HSPA4L Heat shock protein alpha-1 ENEM000016470</p>                                                   | <p>IPI00828021 - HSPA4L Heat shock protein alpha-1 ENEM000016470</p>                                                   | <p>IPI00828021 - HSPA4L Heat shock protein alpha-1 ENEM000016470</p>                                                   |

|                       |         |              |                                                                                     |                                                                                      |                                                                                       |
|-----------------------|---------|--------------|-------------------------------------------------------------------------------------|--------------------------------------------------------------------------------------|---------------------------------------------------------------------------------------|
| IPI00783850 - DDX42   | Unclear | Intermediate | 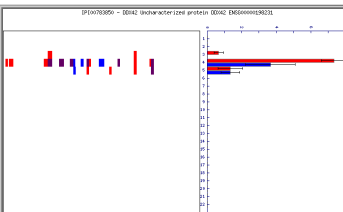    |     |     |
| IPI00002212 - STK24   | Unclear | Intermediate |    |    |    |
| IPI00290461 - EIF3J   | Unclear | Intermediate |    |    |    |
| IPI00170786 - WBP11   | Unclear | Intermediate |    |    |    |
| IPI00387130 - CIAPIN1 | Unclear | Intermediate |   |   |   |
| IPI00221106 - SF3B2   | Unclear | Intermediate |  |  |  |
| IPI00003870 - CLPP    | Unclear | None         |  |  |  |
| IPI00163505 - RBM39   | Unclear | Stable       |  |  |  |

|                       |         |        |                                                                                                                                          |                                                                                                                                          |                                                                                                                                          |
|-----------------------|---------|--------|------------------------------------------------------------------------------------------------------------------------------------------|------------------------------------------------------------------------------------------------------------------------------------------|------------------------------------------------------------------------------------------------------------------------------------------|
| IPI00418313 - ILF3    | Unclear | Stable | <p>IPI00418313 - ILF3 isoform 4 of Interleukin enhancer-binding factor 3 (EN0000001205)</p>                                              | <p>IPI00418313 - ILF3 isoform 4 of Interleukin enhancer-binding factor 3 (EN0000001205)<br/>no potential site-of-cleavage</p>            | <p>IPI00418313 - ILF3 isoform 4 of Interleukin enhancer-binding factor 3 (EN0000001205)</p>                                              |
| IPI00604620 - NCL     | Unclear | Stable | <p>IPI00604620 - NCL isoform 1 of Nucleolin (EN0000001500)</p>                                                                           | <p>IPI00604620 - NCL isoform 1 of Nucleolin (EN0000001500)</p>                                                                           | <p>IPI00604620 - NCL isoform 1 of Nucleolin (EN0000001500)</p>                                                                           |
| IPI00644055 - HNRNPR  | Unclear | Stable | <p>IPI00644055 - HNRNPR heterogeneous nuclear ribonucleoprotein B isoform 1 (EN0000001204)</p>                                           | <p>IPI00644055 - HNRNPR heterogeneous nuclear ribonucleoprotein B isoform 1 (EN0000001204)</p>                                           | <p>IPI00644055 - HNRNPR heterogeneous nuclear ribonucleoprotein B isoform 1 (EN0000001204)</p>                                           |
| IPI00234252 - SMARCC1 | Unclear | Stable | <p>IPI00234252 - SMARCC1 (SMC1)-related matrix-associated actin-dependent regulator of chromatin subfamily C member 1 (EN0000000748)</p> | <p>IPI00234252 - SMARCC1 (SMC1)-related matrix-associated actin-dependent regulator of chromatin subfamily C member 1 (EN0000000748)</p> | <p>IPI00234252 - SMARCC1 (SMC1)-related matrix-associated actin-dependent regulator of chromatin subfamily C member 1 (EN0000000748)</p> |
| IPI00293616 - DDX3Y   | Unclear | Stable | <p>IPI00293616 - DDX3Y ATP-dependent RNA helicase DDX3 (EN0000000748)</p>                                                                | <p>IPI00293616 - DDX3Y ATP-dependent RNA helicase DDX3 (EN0000000748)</p>                                                                | <p>IPI00293616 - DDX3Y ATP-dependent RNA helicase DDX3 (EN0000000748)</p>                                                                |
| IPI00024364 - TNPO1   | Unclear | Stable | <p>IPI00024364 - TNPO1 transporter 1 (EN0000000302)</p>                                                                                  | <p>IPI00024364 - TNPO1 transporter 1 (EN0000000302)<br/>no potential site-of-cleavage</p>                                                | <p>IPI00024364 - TNPO1 transporter 1 (EN0000000302)</p>                                                                                  |
| IPI00146935 - DNMT1L  | Unclear | Stable | <p>IPI00146935 - DNMT1L isoform 1 of Dynamic-1-like protein (EN0000000750)</p>                                                           | <p>IPI00146935 - DNMT1L isoform 1 of Dynamic-1-like protein (EN0000000750)</p>                                                           | <p>IPI00146935 - DNMT1L isoform 1 of Dynamic-1-like protein (EN0000000750)</p>                                                           |
| IPI00293845 - RIF1    | Unclear | Stable | <p>IPI00293845 - RIF1 (RuvA)-interacting protein RIF1 (EN0000000302)</p>                                                                 | <p>IPI00293845 - RIF1 (RuvA)-interacting protein RIF1 (EN0000000302)</p>                                                                 | <p>IPI00293845 - RIF1 (RuvA)-interacting protein RIF1 (EN0000000302)</p>                                                                 |

|                       |         |           |                                                                                                                                                                                   |                                                                                                                                                                                      |                                                                                                                                                                                       |
|-----------------------|---------|-----------|-----------------------------------------------------------------------------------------------------------------------------------------------------------------------------------|--------------------------------------------------------------------------------------------------------------------------------------------------------------------------------------|---------------------------------------------------------------------------------------------------------------------------------------------------------------------------------------|
| IPI00782992 - SRRM2   | Unclear | Stable    | 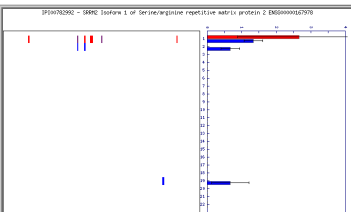 <p>IPI0078292 - SRRM2 Isoform 1 of Serine/arginine repetitive matrix protein 2 (EN000002970)</p> |  <p>IPI0078292 - SRRM2 Isoform 2 of Serine/arginine repetitive matrix protein 2 (EN000002970)</p>   |  <p>IPI0078292 - SRRM2 Isoform 3 of Serine/arginine repetitive matrix protein 2 (EN000002970)</p>   |
| IPI00217975 - LMNB1   | Unclear | Stable    |  <p>IPI0021795 - LMNB1 Isoform 1 (EN000001330)</p>                                               |  <p>IPI0021795 - LMNB1 Isoform 2 (EN000001330)</p>                                                 |  <p>IPI0021795 - LMNB1 Isoform 3 (EN000001330)</p>                                                 |
| IPI00219445 - PSME3   | Unclear | Stable    |  <p>IPI0021945 - PSME3 Isoform 1 of Proteasome activator complex subunit 3 (EN000002147)</p>     |  <p>IPI0021945 - PSME3 Isoform 2 of Proteasome activator complex subunit 3 (EN000002147)</p>       |  <p>IPI0021945 - PSME3 Isoform 3 of Proteasome activator complex subunit 3 (EN000002147)</p>       |
| IPI00002922 - TBL1XR1 | Unclear | Stable    |  <p>IPI000022 - TBL1XR1 F-box/100/40 repeat-containing protein TBL1XR1 (EN000001750)</p>         |  <p>IPI000022 - TBL1XR1 F-box/100/40 repeat-containing protein TBL1XR1 (EN000001750)</p>           |  <p>IPI000022 - TBL1XR1 F-box/100/40 repeat-containing protein TBL1XR1 (EN000001750)</p>           |
| IPI00003627 - ACTL6A  | Unclear | Stable    |  <p>IPI000027 - ACTL6A Isoform 1 of ACTL6A protein (EN000001020)</p>                            |  <p>IPI000027 - ACTL6A Isoform 2 of ACTL6A protein (EN000001020)</p>                              |  <p>IPI000027 - ACTL6A Isoform 3 of ACTL6A protein (EN000001020)</p>                              |
| IPI00183626 - PTBP1   | Unclear | Stable    |  <p>IPI001826 - PTBP1 polyarginine tract-binding protein 1 Isoform 1 (EN000001134)</p>         |  <p>IPI001826 - PTBP1 polyarginine tract-binding protein 1 Isoform 2 (EN000001134)</p>           |  <p>IPI001826 - PTBP1 polyarginine tract-binding protein 1 Isoform 3 (EN000001134)</p>           |
| IPI00328840 - THOC4   | Unclear | Stable    |  <p>IPI003284 - THOC4 THO complex subunit 4 (EN000003384)</p>                                  |  <p>IPI003284 - THOC4 THO complex subunit 4 (EN000003384)<br/>No potential site-of-cleavage!</p> |  <p>IPI003284 - THOC4 THO complex subunit 4 (EN000003384)<br/>No potential site-of-cleavage!</p> |
| IPI00005198 - ILF2    | Unclear | Transient |  <p>IPI000028 - ILF2 Interleukin enhancer-binding factor 2 (EN000001482)</p>                   |  <p>IPI000028 - ILF2 Interleukin enhancer-binding factor 2 (EN000001482)</p>                     |  <p>IPI000028 - ILF2 Interleukin enhancer-binding factor 2 (EN000001482)</p>                     |



|                               |         |           |  |  |  |
|-------------------------------|---------|-----------|--|--|--|
| IPI00024664 - USP5            | Unclear | Transient |  |  |  |
| IPI00023876 - CASP6           | Unclear | Transient |  |  |  |
| IPI00014263 - EIF4H;LOC653994 | Unclear | Transient |  |  |  |
| IPI00016610 - PCBP1           | Unclear | Unclear   |  |  |  |
| IPI00644079 - HNRNPU          | Unclear | Unclear   |  |  |  |
