# Supplementary material
Source: PubMed Central journal article supplement (PMC2597167)
Supplement: NIHMS67899-supplement-05.pdf [file NIHMS67899-supplement-05.pdf]

- (1) Berry, D.M., Benn, S.J., Cheng, A.M., and McGlade, J. (2001). Caspase-dependent cleavage of the hematopoietic specific adaptor protein Gads alters signalling from the T cell receptor. *Oncogene* 20, 1203-1211.
- (2) Gerner, C., Gotzmann, J., Frohwein, U., Schamberger, C., Elliger, A., and Saueremann, G. (2002). Proteome analysis of nuclear matrix proteins during apoptotic chromatin condensation. *Cell Death Differ* 9, 671-681.
- (3) Sundararajan, R., Chen, G., Mukherjee, C., and White, E. (2005). Caspase-dependent processing activates the proapoptotic activity of deleted in breast cancer-1 during tumor necrosis factor-alpha-mediated death signaling. *Oncogene* 24, 4908-4920.
- (4) Van Damme, P., Martens, L., Van Damme, J., Hugelier, K., Staes, A., Vandekerckhove, J., and Gevaert, K. (2005). Caspase-specific and nonspecific in vivo protein processing during Fas-induced apoptosis. *Nat Meth* 2, 771-777.
- (5) Sbodio, J.I., Hicks, S.W., Simon, D., and Machamer, C.E. (2006). GCP60 Preferentially Interacts with a Caspase-generated Golgin-160 Fragment. *J Biol Chem* 281, 27924-27931.
- (6) Kim, J.-T., Kim, K.D., Song, E.Y., Lee, H.G., Kim, J.W., Kim, J.W., Chae, S.-K., Kim, E., Lee, M.-S., Yang, Y., et al. (2006). Apoptosis-inducing factor (AIF) inhibits protein synthesis by interacting with the eukaryotic translation initiation factor 3 subunit p44 (eIF3g). *FEBS Letters* 580, 6375-6383.
- (7) Correia, J.d.S., Miranda, Y., Leonard, N., and Ulevitch, R.J. (2007). The Subunit CSN6 of the COP9 Signalosome Is Cleaved during Apoptosis. *J Biol Chem* 282, 12557-12565.
- (8) Ju, W., Valencia, C.A., Pang, H., Ke, Y., Gao, W., Dong, B., and Liu, R. (2007). Proteome-wide identification of family member-specific natural substrate repertoire of caspases. *Proceedings of the National Academy of Sciences* 104, 14294-14299.
- (9) Bae, S., Ha, T.S., Yoon, Y., Lee, J., Cha, H.J., Yoo, H., Choe, T.B., Li, S., Sohn, I., Kim, J.Y., et al. (2008). Genome-wide screening and identification of novel proteolytic cleavage targets of caspase-8 and -10 in vitro. *Int J Mol Med* 21, 381-386.
- (10) Luthi, A.U., and Martin, S.J. (2007). The CASBAH: a searchable database of caspase substrates. *Cell Death Differ* 14, 641-650.
- (11) Sun, W., Kimura, H., Hattori, N., Tanaka, S., Matsuyama, S., Shiota, K. (2006). Proliferation related acidic leucine-rich protein PAL31 functions as a caspase-3 inhibitor. *Biochem Biophys Res Commun* 342, 817-823.
- (12) Debret, R., El Btaouri, H., Duca L., Rahman, I., Radke, S., Haye, B., Sallenave, J.M., Antonicelli, F. (2003) Annexin A1 processing is associated with caspase-dependent apoptosis in BZR cells. *FEBS Letters* 546, 195-202.
- (13) Rao, R.V., Niazi, K., Mollahan, P., Mao, X., Crippen, D., Poksay, K.S., Chen, S., Bredesen, D.E. (2006). Coupling endoplasmic reticulum stress to the cell-death program: a novel HSP90-independent role for the small chaperone protein p23. *Cell Death Differ* 13, 415-425.
