# Supplementary material
Source: PubMed Central journal article supplement (PMC2597167)
Supplement: NIHMS67899-supplement-06.pdf [file NIHMS67899-supplement-06.pdf]

Proteins identified as cleaved in apoptosis by PROTOMAP from Van Damme, P., et al, 2005

| IPI Number  | Description                                                                                                                                                                                                                                                                                                                                                                 | Total Spectral Counts | Peptograph                                                                            |
|-------------|-----------------------------------------------------------------------------------------------------------------------------------------------------------------------------------------------------------------------------------------------------------------------------------------------------------------------------------------------------------------------------|-----------------------|---------------------------------------------------------------------------------------|
| IPI00031801 | <p>CSDA Isoform 1 of DNA-binding protein A ENSG00000060138</p> <p>Query seq. </p> <p>Specific hits <b>CSP_CDS</b></p> <p>Superfamilies <b>S1_like superfamily</b></p>                                                                                                                     | 131                   |    |
| IPI00219604 | <p>MAP2K1 Dual specificity mitogen-activated protein kinase kinase 1 ENSG00000169032</p> <p>Query seq. </p> <p>Specific hits <b>S_TKc</b></p> <p>Superfamilies <b>S_TKc superfamily</b></p> <p>Multi-domains <b>S_TKc</b></p>                                                             | 59                    |    |
| IPI00794575 | <p>DNM2 98 kDa protein ENSG00000079805</p> <p>Query seq. </p> <p>Specific hits <b>PH_dynamin</b></p> <p>Superfamilies <b>DYNC superfamily</b>, <b>Dynamin_M superfamily</b>, <b>PH-like superfamily</b>, <b>GED superfamily</b></p> <p>Multi-domains <b>Dynamin_N</b></p>                 | 127                   |    |
| IPI00221394 | <p>DKC1 H/ACA ribonucleoprotein complex subunit 4 ENSG00000130826</p> <p>Query seq. </p> <p>Specific hits <b>PseudoU_synth_hDyskerin</b></p> <p>Superfamilies <b>DKC1D superfamily</b>, <b>PseudoU_synth superfamily</b>, <b>PUA superfamily</b></p> <p>Multi-domains <b>PRK04270</b></p> | 35                    |   |
| IPI00744211 | <p>EIF4E2 Uncharacterized protein EIF4E2 ENSG00000135930</p> <p>Query seq. </p> <p>Superfamilies <b>IF4E superfamily</b></p>                                                                                                                                                            | 37                    |  |
| IPI00014263 | <p>EIF4H;LOC653994 Isoform Long of Eukaryotic translation initiation factor 4H ENSG00000106682</p> <p>Query seq. </p> <p>Superfamilies <b>RRM_1 superfamily</b></p>                                                                                                                     | 66                    |  |
| IPI00024255 | <p>GPLOW G patch domain and KOW motifs-containing protein ENSG00000068394</p> <p>Query seq. </p> <p>Superfamilies <b>G-patch superf</b></p>                                                                                                                                             | 51                    |  |
| IPI00396387 | <p>GNL1 Isoform 1 of Guanine nucleotide-binding protein-like 1 ENSG00000204590</p> <p>Query seq. </p> <p>Specific hits <b>HSR1_MMR1</b></p> <p>Superfamilies <b>ABC_ATPase superfamil</b>, <b>ABC_ATPase supe</b></p> <p>Multi-domains <b>COG1161</b></p>                               | 534                   |  |

|                    |                                                                                                                                                                                                                                                                                                                                          |            |                                                                                       |
|--------------------|------------------------------------------------------------------------------------------------------------------------------------------------------------------------------------------------------------------------------------------------------------------------------------------------------------------------------------------|------------|---------------------------------------------------------------------------------------|
| <p>IPI00011913</p> | <p>HNRNPA0 Heterogeneous nuclear ribonucleoprotein A0 ENSG00000177733</p> <p>Query seq. 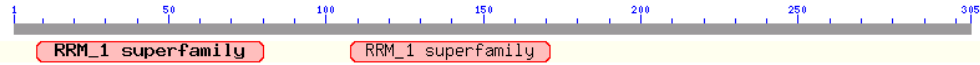</p> <p>Superfamilies RRM_1 superfamily RRM_1 superfamily</p>                                                                                                  | <p>35</p>  |    |
| <p>IPI00789551</p> | <p>MATR3 100 kDa protein ENSG00000015479</p> <p>Query seq. </p> <p>Superfamilies zf-U1 RRM_1 superfamily zf-U1</p> <p>Multi-domains MDN1</p>                                                                                                           | <p>169</p> |    |
| <p>IPI00183626</p> | <p>PTBP1 polypyrimidine tract-binding protein 1 isoform a ENSG00000011304</p> <p>Query seq. </p> <p>Superfamilies RRM_1 superfamily RRM_1 superfamily RRM_1 superfamily RRM_1 superfamily</p>                                                          | <p>372</p> |    |
| <p>IPI00219445</p> | <p>PSME3 Isoform 2 of Proteasome activator complex subunit 3 ENSG00000131467</p> <p>Query seq. </p> <p>Superfamilies PA28_alpha superfamily PA28_beta superfamily</p>                                                                                  | <p>223</p> |    |
| <p>IPI00386516</p> | <p>KIAA0174 KIAA0174 protein ENSG00000182149</p> <p>Query seq. </p> <p>Superfamilies DUF292 superfamily</p>                                                                                                                                            | <p>37</p>  |    |
| <p>IPI00221106</p> | <p>SF3B2 splicing factor 3B subunit 2 ENSG00000087365</p> <p>Query seq. </p> <p>Superfamilies SAP DUF382 superfamily PSP super</p>                                                                                                                   | <p>59</p>  |   |
| <p>IPI00746657</p> | <p>U2AF2 Uncharacterized protein U2AF2 ENSG00000063244</p> <p>Query seq. </p> <p>Superfamilies RRM_1 superfamily RRM_1 superfamily RRM_1 superfamily</p>                                                                                             | <p>166</p> |  |
| <p>IPI00438229</p> | <p>TRIM28 Isoform 1 of Transcription intermediary factor 1-beta ENSG00000130726</p> <p>Query seq. </p> <p>Specific hits Zn<sup>2+</sup> binding site BBOX</p> <p>Superfamilies BBOX super BBOX super BBC superfamily PHD super Bromodomain super</p> | <p>443</p> |  |
| <p>IPI00397834</p> | <p>URP2 Isoform 1 of Unc-112-related protein 2 ENSG00000149781</p> <p>Query seq. </p> <p>Superfamilies PH-like core FERM_M super PH-like superfamily FERM_M super</p> <p>Multi-domains B41</p>                                                       | <p>343</p> |  |
| <p>IPI00418471</p> | <p>VIM Vimentin ENSG00000026025</p> <p>Query seq. </p> <p>Superfamilies Filament_head super</p> <p>Multi-domains Filament</p>                                                                                                                        | <p>123</p> |  |

|                    |                                                                                                                                                                                                                                                                                                                                |            |                                                                                      |
|--------------------|--------------------------------------------------------------------------------------------------------------------------------------------------------------------------------------------------------------------------------------------------------------------------------------------------------------------------------|------------|--------------------------------------------------------------------------------------|
| <p>IPI00010320</p> | <p>CBX1 Chromobox protein homolog 1 ENSG00000108468</p> <p>Query seq. </p> <p>Specific hits <b>CHROMO</b> <b>ChSh</b></p> <p>Superfamilies <b>CHROMO superfamily</b> <b>ChSh superfamily</b></p>                                             | <p>18</p>  |   |
| <p>IPI00290461</p> | <p>EIF3J Eukaryotic translation initiation factor 3 subunit 1 ENSG00000104131</p> <p>Query seq. </p> <p>Superfamilies <b>eIF3_subunit superfamily</b></p>                                                                                    | <p>31</p>  |   |
| <p>IPI00013830</p> | <p>SNW1 SNW domain-containing protein 1 ENSG00000100603</p> <p>Query seq. </p> <p>Superfamilies <b>SKIP_SNW superfamily</b></p>                                                                                                              | <p>28</p>  |   |
| <p>IPI00025815</p> | <p>TARDBP TDP43 ENSG00000120948</p> <p>Query seq. </p> <p>Superfamilies <b>RRM_1 superfamily</b> <b>RRM_1 superfamily</b></p>                                                                                                                | <p>37</p>  |   |
| <p>IPI00026156</p> | <p>HCLS1 Hematopoietic lineage cell-specific protein ENSG00000180353</p> <p>Query seq. </p> <p>Specific hits <b>SH3</b></p> <p>Superfamilies <b>SH3 superfamily</b></p>                                                                      | <p>85</p>  |   |
| <p>IPI00293655</p> | <p>DDX1 ATP-dependent RNA helicase DDX1 ENSG00000079785</p> <p>Query seq. </p> <p>Specific hits <b>HELICc</b></p> <p>Superfamilies <b>ABC_ATPase s</b> <b>SPRY superfamily</b> <b>ABC_ATPase superfamily</b> <b>HELICc superfamily</b></p> | <p>312</p> |  |

Proteins identified as not cleaved in apoptosis by PROTOMAP from Van Damme, P., et al, 2005

| IPI Number  | Description                                                                                                                                                                                                                                                                                                                                                                                                          | Total Spectral Counts | Peptograph                                                                            |
|-------------|----------------------------------------------------------------------------------------------------------------------------------------------------------------------------------------------------------------------------------------------------------------------------------------------------------------------------------------------------------------------------------------------------------------------|-----------------------|---------------------------------------------------------------------------------------|
| IPI00011603 | <p>PSMD3 26S proteasome non-ATPase regulatory subunit 3 ENSG00000108344</p> <p>Query seq. </p> <p>Superfamilies <b>PCI superfamily</b> <b>Ren3_C superfamily</b></p>                                                                                                                                                               | 42                    |    |
| IPI00007334 | <p>ACIN1 Isoform 1 of Apoptotic chromatin condensation inducer in the nucleus ENSG00000100813</p> <p>Query seq. </p> <p>Superfamilies <b>SHP</b></p>                                                                                                                                                                               | 74                    |    |
| IPI00027230 | <p>HSP90B1 Endoplasmic precursor ENSG00000166598</p> <p>Query seq. </p> <p>Superfamilies <b>HSPase_c superfamily</b> <b>HSP</b> <b>HSP90 superfamily</b></p> <p>Multi-domains <b>PRK05218</b></p>                                                                                                                                  | 752                   |    |
| IPI00465260 | <p>GARS Glycyl-tRNA synthetase ENSG00000106105</p> <p>Query seq. </p> <p>Specific hits <b>GlyRS_RNA</b> <b>GlyRS-like_core</b> <b>GlyRS_anticodon</b></p> <p>Superfamilies <b>S15_NS1_EF</b> <b>class_II_aaRS</b> <b>class_II_aaRS-like_core superfamily</b> <b>MGTP_anticodon superfamil</b></p> <p>Multi-domains <b>GRS1</b></p> | 325                   |   |
| IPI00457284 | <p>GPATCH8 G patch domain containing 8 ENSG00000186566</p> <p>Query seq. </p> <p>Multi-domains <b>SbcC</b> <b>PRK08026</b></p>                                                                                                                                                                                                   | 4                     |  |
| IPI00307092 | <p>KARS Lysyl-tRNA synthetase ENSG00000065427</p> <p>Query seq. </p> <p>Specific hits <b>LysRS_N</b> <b>LysRS_core</b></p> <p>Superfamilies <b>RPA2_OBF_family superfamil</b> <b>class_II_aaRS-like_core superfamily</b></p> <p>Multi-domains <b>LysU</b></p>                                                                    | 68                    |  |
| IPI00019502 | <p>MYH9 Myosin-9 ENSG00000100345</p> <p>Query seq. </p> <p>Specific hits <b>MYSc_type_II</b></p> <p>Superfamilies <b>Motor_domain superfamily</b></p> <p>Multi-domains <b>Myosin_tail_1</b></p>                                                                                                                                  | 2970                  |  |
| IPI00797126 | <p>NACA 95 kDa protein ENSG00000196531</p> <p>Query seq. </p> <p>Superfamilies <b>NRC super</b></p> <p>Multi-domains <b>EGD2</b></p>                                                                                                                                                                                             | 132                   |  |
| IPI00332499 | <p>NASP nuclear autoantigenic sperm protein isoform 1 ENSG00000132780</p> <p>Query seq. </p> <p>Specific hits <b>TPR</b></p> <p>Superfamilies <b>TPR superfamily</b></p> <p>Multi-domains <b>MDN1</b></p>                                                                                                                        | 259                   |  |

|                    |                                                                                                                                                                                                                                                                                                                                                                     |            |                                                                                       |
|--------------------|---------------------------------------------------------------------------------------------------------------------------------------------------------------------------------------------------------------------------------------------------------------------------------------------------------------------------------------------------------------------|------------|---------------------------------------------------------------------------------------|
| <p>IPI00041325</p> | <p>NOLA2 H/ACA ribonucleoprotein complex subunit 2 ENSG00000145912</p> <p>Query seq. </p> <p>Superfamilies </p>                                                                                 | <p>27</p>  |     |
| <p>IPI00023860</p> | <p>NAP1L1 Nucleosome assembly protein 1-like 1 ENSG00000187109</p> <p>Query seq. </p> <p>Superfamilies </p>                                                                                     | <p>288</p> |    |
| <p>IPI00005792</p> | <p>PABPN1 Isoform 1 of Polyadenylate-binding protein 2 ENSG00000100836</p> <p>Query seq. </p> <p>Superfamilies </p>                                                                             | <p>7</p>   |    |
| <p>IPI00260715</p> | <p>FUS Fus-like protein (Fragment) ENSG00000089280</p> <p>Query seq. </p> <p>Superfamilies </p>                                                                                                 | <p>30</p>  |    |
| <p>IPI00176706</p> | <p>RBM17 Splicing factor 45 ENSG00000134453</p> <p>Query seq. </p> <p>Superfamilies </p>                                                                                                        | <p>7</p>   |    |
| <p>IPI00513853</p> | <p>STX12 Syntaxin 12 ENSG00000117758</p> <p>Query seq. </p> <p>Specific hits </p> <p>Superfamilies </p> | <p>2</p>   |   |
| <p>IPI00550191</p> | <p>C9orf78 Uncharacterized protein C9orf78 ENSG00000136819</p> <p>Query seq. </p> <p>Superfamilies </p>                                                                                     | <p>12</p>  |  |
| <p>IPI00072377</p> | <p>SET Isoform 1 of Protein SET ENSG00000119335</p> <p>Query seq. </p> <p>Superfamilies </p>                                                                                                | <p>90</p>  |  |
